# Supplementary material for: Structural equation modeling the “control of gut overgrowth” in the prevention of ICU-acquired Gram-negative infection
Source: Springer Nature journal article supplement (doi:10.1186/s13054-020-02906-6), 2020-05-04
Supplement: MOESM1 [file 17952998]

## Supplemental file contents:

|                                                                                                            |         |
|------------------------------------------------------------------------------------------------------------|---------|
| Table S1: <i>Pseudomonas</i> and <i>Acinetobacter</i> data: observational studies (Benchmark groups) 2 - 5 | 2 - 5   |
| Table S2: <i>Pseudomonas</i> and <i>Acinetobacter</i> data: Groups of non-decontamination studies          | 6 - 9   |
| Table S3: <i>Pseudomonas</i> and <i>Acinetobacter</i> data: Groups of anti-septic studies                  | 10 – 11 |
| Table S4: <i>Pseudomonas</i> and <i>Acinetobacter</i> data: Groups of TAP studies                          | 12 – 15 |
| Table S5: Development of GSEM model                                                                        | 16-17   |
| Table S6: VAP count data                                                                                   | 18      |
| Table S7: Bacteremia count data                                                                            | 19-20   |
| Additional details of methods used and additional analyses                                                 | 21      |
| References                                                                                                 | 22 – 35 |
| Fig S1. Search, screening, triage and decant of studies and groups                                         | 35- 36  |
| Fig S2. VAP prevention effect size; non decontamination studies                                            | 37      |
| Fig S3. VAP prevention effect size; anti-septic studies                                                    | 38      |
| Fig S4. VAP prevention effect size; studies of TAP                                                         | 39      |
| Fig S5. Bacteremia prevention effect size; non-decontamination studies                                     | 40      |
| Fig S6. Bacteremia prevention effect size; anti-septic studies                                             | 41      |
| Fig S7. Bacteremia prevention effect size; studies of TAP                                                  | 42      |
| Fig S8 - S14. GSEM models 1 - 7                                                                            | 43-49   |
| Fig S15. <i>Pseudomonas</i> bacteremia incidence: observational studies                                    | 50      |
| Fig S16. <i>Pseudomonas</i> bacteremia incidence: non-decontamination & anti-septic studies                | 51      |
| Fig S17. <i>Pseudomonas</i> bacteremia incidence: studies of TAP: control                                  | 52      |
| Fig S18. <i>Pseudomonas</i> bacteremia incidence: studies of TAP: intervention                             | 53      |
| Fig S19. <i>Acinetobacter</i> bacteremia incidence: observational studies                                  | 54      |
| Fig S20. <i>Acinetobacter</i> bacteremia incidence: non-decontamination & anti-septic studies              | 55      |
| Fig S21. <i>Acinetobacter</i> bacteremia incidence: studies of TAP: control                                | 56      |
| Fig S22. <i>Acinetobacter</i> bacteremia incidence: studies of TAP: intervention                           | 57      |

Supplemental file abbreviations: TAP = Topical antibiotic prophylaxis; PPAP = Protocolized parenteral antibiotic prophylaxis; EAP = enteral antibiotic prophylaxis;

**Table S1: *Pseudomonas* and *Acinetobacter* data: observational studies (Benchmark groups) <sup>a</sup>**

| author          | Year | Ref | Notes | MV% | LOS | Patients | VAP    |        | Bacteremia |        |
|-----------------|------|-----|-------|-----|-----|----------|--------|--------|------------|--------|
|                 |      |     |       |     |     |          | v_ps_n | v_ac_n | b_ps_n     | b_ac_n |
| A'court         | 1993 | 1   | T     | 100 | 12  | 150      | 17     | 0      | 6          |        |
| Alvarez-Lerma   | 1996 | 2   |       | 93  | 9   | 6494     | 174    | 56     |            |        |
| Antonelli       | 1994 | 3   |       | 70  | 17  | 124      | 5      | 6      |            |        |
| Apostolopoulou  | 2003 | 4   |       | 100 | 16  | 175      | 17     | 6      |            |        |
| Baraibar        | 1997 | 5   |       | 100 | 8   | 707      |        | 12     |            |        |
| Beck-Sague      | 1996 | 6   |       | 100 | 5   | 145      | 5      | 0      |            |        |
| Bekaert         | 2011 | 7   |       | 100 | 8   | 4479     | 155    | 24     |            |        |
| Bercault_IHT    | 2005 | 8   |       | 100 | 9   | 118      | 9      | 2      |            |        |
| Bercault_all    | 2005 | 8   |       | 100 | 10  | 236      | 12     | 5      |            |        |
| Berrouane_all   | 1998 | 9   |       | 83  | 13  | 565      | 40     |        |            |        |
| Bochicchio      | 2004 | 10  | T     | 100 | 13  | 678      | 22     | 10     |            |        |
| Bonten'94       | 1994 | 11  |       | 100 | 25  | 64       | 6      | 0      |            |        |
| Boots'06_All    | 2006 | 12  |       | 100 | 13  | 381      | 14     | 14     |            |        |
| Boots           | 2008 | 13  |       | 100 | 13  | 412      | 15     | 14     |            |        |
| Bornstain       | 2004 | 14  |       | 100 | 12  | 747      | 23     | 1      |            |        |
| Braun           | 1986 | 15  |       | 100 | 6   | 66       | 0      |        |            |        |
| Bregeon         | 1997 | 16  |       | 100 | 10  | 660      | 33     | 10     |            |        |
| Bronchard       | 2004 | 17  | T     | 100 | 23  | 109      | 0      |        |            |        |
| Cade            | 1993 | 18  |       | 98  | 16  | 98       | 4      | 0      | 1          | 0      |
| Cavalcanti      | 2006 | 19  |       | 100 | 5   | 190      | 9      | 1      |            |        |
| Cenderero       | 1999 | 20  |       | 100 | 7   | 123      | 4      | 2      |            |        |
| Chari           | 2015 | 21  |       | 100 | 8   | 175      | 20     | 12     |            |        |
| Chastre         | 1998 | 22  |       | 100 | 19  | 243      | 36     | 13     |            |        |
| Chevret         | 1993 | 23  |       | 100 | 5   | 255      | 21     | 5      |            |        |
| Cook_non-trauma | 2010 | 24  |       | 100 | 6   | 2080     | 7      | 1      |            |        |
| Cook_trauma     | 2010 | 24  | T     | 100 | 7   | 511      | 16     | 8      |            |        |
| Craven-medical  | 1988 | 25  |       | 100 | 6   | 277      | 9      | 0      | 1          |        |
| Craven-surgical | 1988 | 25  |       | 100 | 6   | 521      | 17     | 0      | 6          |        |
| Daschner        | 1988 | 26  |       | 100 | 6   | 116      | 9      | 1      |            |        |
| de_Latorre      | 1995 | 27  |       | 100 | 15  | 80       | 7      | 0      |            |        |
| El-Masri        | 2004 | 28  |       | NS  | 11  | 361      |        |        | 1          | 3      |
| Ensminger       | 2006 | 29  | C     | 100 | 7   | 92       | 2      | 1      |            |        |
| Esteve          | 2007 | 30  |       | 80  | 16  | 395      |        |        | 8          | 1      |
| Esteve          | 2007 | 30  |       | 78  | 17  | 404      |        |        | 4          | 6      |
| Evans           | 2010 | 31  |       | 100 | 8   | 416      | 18     |        |            |        |
| Ewig            | 1999 | 32  |       | 100 | 10  | 48       | 4      | 0      |            |        |
| Fabian_all      | 1993 | 33  |       | 100 | 11  | 278      | 10     | 15     |            |        |
| Fagon'89        | 1989 | 34  |       | 100 | 13  | 567      | 16     | 8      |            |        |

**Table S1 (continued): *Pseudomonas* VAP data: observational studies (Benchmark groups)**

| author                        | Year | Ref | Notes | MV% | LOS | Patients | VAP    |        | Bacteremia |        |
|-------------------------------|------|-----|-------|-----|-----|----------|--------|--------|------------|--------|
|                               |      |     |       |     |     |          | v_ps_n | v_ac_n | b_ps_n     | b_ac_n |
| <b>Gacouin</b>                | 2009 | 35  |       | 100 | 11  | 361      | 21     | 4      |            |        |
| <b>Garrouste-Orgeas</b>       | 1997 | 36  |       | 100 | 11  | 86       | 9      | 11     |            |        |
| <b>Garrouste-Orgeas</b>       | 2006 | 37  |       | 75  | 11  | 3247     |        |        | 19         | 1      |
| <b>George</b>                 | 1998 | 38  |       | 100 | 6   | 223      | 6      | 1      |            |        |
| <b>Georges</b>                | 2000 | 39  |       | 100 | 18  | 135      | 19     | 8      |            |        |
| <b>Giamarellos-Bourboulis</b> | 2009 | 40  | T     | 100 | 12  | 72       | 5      | 17     | 1          | 2      |
| <b>Giard</b>                  | 2008 | 41  |       | 100 | 8   | 7236     | 168    |        |            |        |
| <b>Gruson-97-98</b>           | 2000 | 42  | I     | 100 | 12  | 1029     | 47     | 7      |            |        |
| <b>Gruson-95-96</b>           | 2000 | 42  |       | 100 | 12  | 1004     | 62     | 20     |            |        |
| <b>Gruson-99-01</b>           | 2003 | 43  |       | 100 | 12  | 823      | 41     | 15     |            |        |
| <b>Guérin</b>                 | 1997 | 44  |       | 100 | 19  | 260      | 14     | 1      |            |        |
| <b>Heyland</b>                | 1999 | 45  |       | 100 | 16  | 1014     | 38     | 6      |            |        |
| <b>Holzappel_93</b>           | 1993 | 46  |       | 100 | 10  | 300      | 0      | 1      | 0          |        |
| <b>Hortal</b>                 | 2009 | 47  | C     | 100 | 9   | 231      | 40     | 4      |            |        |
| <b>Huang_1SC</b>              | 2013 | 48  |       | NS  | 3   | 23480    |        |        | 14         | 7      |
| <b>Huang_1pre</b>             | 2013 | 48  |       | NS  | 3   | 15816    |        |        | 5          | 9      |
| <b>Hugonnet</b>               | 2007 | 49  |       | 100 | 6   | 936      | 31     | 8      |            |        |
| <b>Hyllienmark</b>            | 2007 | 50  |       | 100 | 4   | 221      | 0      | 1      |            |        |
| <b>Ibáñez</b>                 | 2000 | 51  |       | 100 | 8   | 30       | 1      | 1      |            |        |
| <b>Ibrahim'00</b>             | 2000 | 52  |       | 69  | 11  | 4913     |        |        | 22         | 8      |
| <b>Ibrahim'00</b>             | 2000 | 52  |       | 100 | 5   | 1882     | 130    | 16     |            |        |
| <b>Jaillette</b>              | 2011 | 53  |       | 100 | 15  | 439      | 59     | 22     |            |        |
| <b>Jimenez</b>                | 1989 | 54  |       | 100 | 6   | 77       | 7      | 6      |            |        |
| <b>Kallel</b>                 | 2005 | 55  |       | 100 | 14  | 241      | 34     | 31     |            |        |
| <b>Ko</b>                     | 2013 | 56  |       | 100 | 23  | 1453     |        |        | 21         | 11     |
| <b>Kollef' 93</b>             | 1993 | 57  |       | 100 | 7   | 277      | 4      | 1      |            |        |
| <b>Kollef '95</b>             | 1995 | 58  |       | 100 | 15  | 300      | 23     | 6      |            |        |
| <b>Kollef '97</b>             | 1997 | 59  |       | 100 | 8   | 521      | 15     | 2      |            |        |
| <b>Kollef'14_Europe</b>       | 2014 | 60  |       | 100 | 11  | 495      | 24     |        |            |        |
| <b>Kollef'14_USA</b>          | 2014 | 60  |       | 100 | 11  | 502      | 17     |        |            |        |
| <b>Koss- N</b>                | 2001 | 61  |       | 100 | 10  | 87       | 4      | 2      |            |        |
| <b>Koss- P</b>                | 2001 | 61  | I     | 100 | 8   | 66       | 9      | 2      |            |        |
| <b>Kunac</b>                  | 2014 | 62  |       | 100 | 5   | 716      | 23     | 13     | 2          | 1      |
| <b>Laggner</b>                | 1989 | 63  |       | 100 | 11  | 32       | 0      | 0      |            |        |
| <b>Lambert</b>                | 2011 | 64  |       | NS  | 5   | 119699   |        |        | 389        | 143    |
| <b>Laupland</b>               | 2002 | 65  |       | NS  | 5   | 1017     |        |        | 2          | 0      |
| <b>Laupland</b>               | 2004 | 66  |       | 84  | 5   | 4473     |        |        | 11         | 4      |

**Table S1 (continued): *Pseudomonas* VAP data: observational studies (Benchmark groups)**

| author            | Year | Ref | Notes | MV% | LOS | Patients | VAP    |        | Bacteremia |        |
|-------------------|------|-----|-------|-----|-----|----------|--------|--------|------------|--------|
|                   |      |     |       |     |     |          | v_ps_n | v_ac_n | b_ps_n     | b_ac_n |
| Lepelletier       | 2010 | 67  | T     | 100 | 13  | 161      | 10     |        |            |        |
| Luyt              | 2005 | 68  |       | 100 | 35  | 290      | 11     | 3      |            |        |
| Magnason          | 2008 | 69  |       | 100 | 8   | 280      | 5      | 0      | 0          | 0      |
| Magret_trauma     | 2010 | 70  | T     | 100 | 5   | 354      | 17     | 30     |            |        |
| Magret_non-trauma | 2010 | 70  |       | 100 | 5   | 2082     | 64     | 42     |            |        |
| Mahul             | 1992 | 71  |       | 100 | 17  | 145      | 8      | 3      |            |        |
| Makris            | 2011 | 72  | I     | 100 | 22  | 152      | 7      |        |            |        |
| Markowicz         | 2000 | 73  |       | 100 | 12  | 744      | 58     | 13     |            |        |
| Moine             | 2002 | 74  |       | 80  | 14  | 764      | 27     | 1      |            |        |
| Montecalvo_G      | 1992 | 75  |       | 100 | 10  | 19       |        |        | 0          |        |
| Myny              | 2005 | 76  |       | 100 | 6   | 385      | 28     | 13     |            |        |
| Nguile-Makao      | 2010 | 77  |       | 100 | 7   | 2873     | 130    |        |            |        |
| Nielsen           | 1992 | 78  |       | 100 | 5   | 242      | 3      | 0      |            |        |
| Nseir             | 2005 | 79  |       | 100 | 24  | 1241     | 32     | 20     |            |        |
| Osmon             | 2003 | 80  |       | 72  | 8   | 893      |        |        | 9          |        |
| Papazian          | 1996 | 81  |       | 100 | 16  | 586      | 26     | 5      |            |        |
| Potgieter         | 1987 | 82  |       | 78  | 9   | 250      | 26     | 32     |            |        |
| Rello'91          | 1991 | 83  |       | 100 | 8   | 264      | 14     | 2      |            |        |
| Rello'92          | 1992 | 84  |       | 67  | 9   | 161      | 4      |        |            |        |
| Rello'94          | 1994 | 85  |       | 72  | 7   |          |        |        | 16         | 5      |
| Rello'94          | 1994 | 86  |       | 100 | 13  | 568      | 18     |        |            |        |
| Rello'96          | 1996 | 87  |       | 100 | 8   | 83       | 4      |        |            |        |
| Rello'02          | 2002 | 88  |       | 100 | 8   | 9080     | 119    |        |            |        |
| Rello'03          | 2003 | 89  |       | 100 | 7   | 99       | 8      | 2      |            |        |
| Reusser           | 1989 | 90  |       | 100 | 7   | 40       | 2      | 1      | 0          | 0      |
| Rincón-Ferrari    | 2004 | 91  |       | 100 | 10  | 310      | 6      | 27     |            |        |
| Rodriguez         | 1991 | 92  | T     | 100 | 14  | 294      | 31     | 11     |            |        |
| Ruiz-Santana      | 1987 | 93  |       | 100 | 7   | 1005     | 56     | 0      |            |        |
| Salata            | 1987 | 94  |       | 100 | 14  | 51       | 7      | 0      |            |        |
| Shahin            | 2013 | 95  |       | 100 | 6   | 267      | 4      |        |            |        |
| Sligl             | 2006 | 96  |       | NS  | 6   | 6544     |        |        | 10         | 1      |
| Sofianou          | 2000 | 97  |       | 100 | 36  | 198      | 19     | 35     |            |        |
| Stéphan           | 2006 | 98  | T     | 100 | 16  | 175      | 14     | 8      |            |        |
| Tejada-Artigas    | 2001 | 99  |       | 100 | 12  | 103      | 5      | 10     |            |        |
| Thompson          | 2008 | 100 |       | NS  | 6   | 4270     |        |        | 13         | 1      |
| Timsit            | 1996 | 101 |       | 100 | 19  | 387      | 11     | 8      |            |        |
| Torres            | 1990 | 102 |       | 100 | 4   | 322      | 5      | 9      |            |        |

**Table S1 (continued): *Pseudomonas* VAP data: observational studies (Benchmark groups)**

| author    | Year | Ref | Notes | MV% | LOS | Patients | VAP    |        | Bacteremia |        |
|-----------|------|-----|-------|-----|-----|----------|--------|--------|------------|--------|
|           |      |     |       |     |     |          | v_ps_n | v_ac_n | b_ps_n     | b_ac_n |
| Trouillet | 1998 | 103 |       | 100 | 17  | 498      | 39     | 22     |            |        |
| Urli      | 2002 | 104 |       | 95  | 21  | 178      | 27     |        | 3          |        |
| Valles    | 2007 | 105 |       | 100 | 22  | 60       | 15     | 0      |            |        |
| Vanhems   | 2011 | 106 |       | 100 | 6   | 3387     | 24     |        |            |        |
| Verhamme  | 2007 | 107 |       | 84  | 8   | 4000     | 54     | 3      |            |        |
| Violan    | 1998 | 108 |       | 100 | 16  | 314      | 25     | 1      |            |        |
| Warren    | 2001 | 109 |       | 28  | 4   | 3163     |        |        | 3          | 0      |
| Woske     | 2001 | 110 |       | 100 | 15  | 103      | 8      | 1      |            |        |
| Zahar     | 2009 | 111 |       | 100 | 9   | 1233     | 62     |        |            |        |

## Table S1 footnotes

T – Data originating from a study for which the majority of ICU admission were for trauma

I – Infection control intervention to entire ICU

NS – Not stated; LOS is mean or median length of ICU stay

v\_ps\_n is the count of *Pseudomonas* VAP and v\_ac\_n is the count of *Acinetobacter* VAP

b\_ps\_n is the count of *Pseudomonas* bacteremia and b\_ac\_n is the count of *Acinetobacter* bacteremia

Several (n = 43) of these studies were cited in the following source systematic reviews.

- Melsen WG, Rovers MM, Bonten MJM: Ventilator-associated pneumonia and mortality: A systematic review of observational studies. *Crit Care Med* 2009, 37:2709–2718.
- Safdar N, Dezfulian C, Collard HR, Saint S: Clinical and economic consequences of ventilator-associated pneumonia: a systematic review. *Crit Care Med* 2005, 33:2184–93.
- Agrafiotis M, Siempos II, Ntaidou TK, Falagas ME. Attributable mortality of ventilator-associated pneumonia: a meta-analysis. *Intern J Tub Lung Dis.* 2011;15(9):1154-1163.

**Table S2: *Pseudomonas* and *Acinetobacter* data: Groups of non decontamination studies <sup>a</sup>**

| author           | Year | Ref | Notes | MV% | LOS | Patients | VAP    |        | Bacteremia |        |
|------------------|------|-----|-------|-----|-----|----------|--------|--------|------------|--------|
|                  |      |     |       |     |     |          | v_ps_n | v_ac_n | b_ps_n     | b_ac_n |
| Acosta-escribano | 2010 | 112 | T     | 100 | 18  | 54       | 4      | 0      |            |        |
| Acosta-escribano | 2010 | 112 | T     | 100 | 16  | 50       | 3      | 0      |            |        |
| Bonten '95       | 1995 | 113 |       | 100 | 17  | 67       | 11     | 0      |            |        |
| Bonten '95       | 1995 | 113 |       | 100 | 19  | 74       | 7      | 1      |            |        |
| Combes           | 2000 | 114 | T     | 100 | 16  | 50       | 0      |        |            |        |
| Combes           | 2000 | 114 | T     | 100 | 20  | 54       | 0      |        |            |        |
| Cook             | 1998 | 115 |       | 100 | 9   | 596      | 20     |        |            |        |
| Cook             | 1998 | 115 |       | 100 | 9   | 604      | 21     |        |            |        |
| Dreyfuss         | 1991 | 116 |       | 100 | 13  | 35       | 3      | 3      |            |        |
| Dreyfuss         | 1991 | 116 |       | 100 | 10  | 28       | 1      | 2      |            |        |
| Daumal           | 1999 | 117 |       | 100 | 7   | 174      | 11     |        |            |        |
| Daumal           | 1999 | 117 |       | 100 | 7   | 187      | 12     |        |            |        |
| Drakulovic       | 1999 | 118 |       | 100 | 10  | 47       | 3      | 1      |            |        |
| Drakulovic       | 1999 | 118 |       | 100 | 9   | 39       | 1      | 0      |            |        |
| Dreyfuss         | 1995 | 119 |       | 100 | 13  | 70       | 1      | 2      |            |        |
| Dreyfuss         | 1995 | 119 |       | 100 | 10  | 61       | 0      | 3      |            |        |
| Driks            | 1987 | 120 |       | 100 | 14  | 69       | 5      |        |            |        |
| Driks            | 1987 | 120 |       | 100 | 11  | 61       | 1      |        |            |        |
| Forestier        | 2008 | 121 |       | 100 | 13  | 106      | 8      |        |            |        |
| Forestier        | 2008 | 121 |       | 100 | 13  | 102      | 3      |        |            |        |
| Heyland          | 1999 | 122 |       | 100 | 12  | 46       | 0      |        |            |        |
| Heyland          | 1999 | 122 |       | 100 | 13  | 49       | 0      |        |            |        |
| Holzapfel_C_99   | 1999 | 123 |       | 100 | 15  | 200      | 6      | 3      | 0          | 0      |
| Holzapfel_I_99   | 1999 | 123 |       | 100 | 17  | 199      | 10     | 4      | 2          | 1      |
| Kirschenbaum     | 2002 | 124 |       | 100 | 12  | 20       | 5      |        |            |        |
| Kirschenbaum     | 2002 | 124 |       | 100 | 12  | 17       | 1      |        |            |        |
| Kirton           | 1997 | 125 |       | 100 | 16  | 140      | 6      |        |            |        |
| Kirton           | 1997 | 125 |       | 100 | 20  | 140      | 6      |        |            |        |
| Knight           | 2009 | 126 |       | 100 | 7   | 129      | 1      | 1      |            |        |
| Knight           | 2009 | 126 |       | 100 | 6   | 130      | 0      | 3      |            |        |
| Kollef '97_pre   | 1997 | 127 |       | 90  | 3   | 353      | 7      | 2      | 2          | 1      |
| Kollef '97_post  | 1997 | 127 |       | 90  | 2   | 327      | 3      | 1      | 1          | 0      |
| Kollef           | 2008 | 128 |       | 100 | 4   | 743      | 11     | 5      |            |        |
| Kollef_silverETT | 2008 | 128 |       | 100 | 4   | 766      | 8      | 1      |            |        |
| Kortbeek         | 1999 | 129 | T     | 100 | 7   | 43       | 0      | 1      |            |        |
| Kortbeek         | 1999 | 129 | T     | 100 | 10  | 37       | 0      | 1      |            |        |

**Table S2 (continued): *Pseudomonas* and *Acinetobacter* data: Groups of non decontamination studies <sup>a</sup>**

| author        | Year | Ref | Notes | MV% | LOS | Patients | VAP    |        | Bacteremia |        |
|---------------|------|-----|-------|-----|-----|----------|--------|--------|------------|--------|
|               |      |     |       |     |     |          | v_ps_n | v_ac_n | b_ps_n     | b_ac_n |
| Lacherade '05 | 2005 | 130 |       | 100 | 25  | 184      | 14     | 0      |            |        |
| Lacherade '05 | 2005 | 130 |       | 100 | 21  | 185      | 9      | 2      |            |        |
| Lacherade '10 | 2010 | 131 |       | 100 | 11  | 164      | 16     | 2      |            |        |
| Lacherade '10 | 2010 | 131 |       | 100 | 11  | 169      | 9      | 2      |            |        |
| Laueny        | 2014 | 132 |       | 100 | 10  | 91       | 0      | 0      |            |        |
| Laueny        | 2014 | 132 |       | 100 | 15  | 98       | 0      | 1      |            |        |
| Lorente '03   | 2003 | 133 |       | 100 | 18  | 116      | 10     | 1      |            |        |
| Lorente '03   | 2003 | 133 |       | 100 | 16  | 114      | 9      | 0      |            |        |
| Lorente '04   | 2004 | 134 |       | 100 | 16  | 143      | 8      | 1      |            |        |
| Lorente '04   | 2004 | 134 |       | 100 | 20  | 161      | 9      | 3      |            |        |
| Lorente'05    | 2006 | 135 |       | 100 | 13  | 233      | 12     | 2      |            |        |
| Lorente'05    | 2006 | 135 |       | 100 | 13  | 210      | 12     | 1      |            |        |
| Lorente'06a   | 2005 | 136 |       | 100 | 10  | 221      | 7      | 1      |            |        |
| Lorente'06a   | 2005 | 136 |       | 100 | 10  | 236      | 9      | 1      |            |        |
| Lorente'06b   | 2006 | 137 |       | 100 | 21  | 51       | 5      |        |            |        |
| Lorente'06b   | 2006 | 137 |       | 100 | 20  | 53       | 2      |        |            |        |
| Lorente'07    | 2007 | 138 |       | 100 | 16  | 140      | 4      | 1      |            |        |
| Lorente'07    | 2007 | 138 |       | 100 | 14  | 140      | 4      | 3      |            |        |
| Lorente'14    | 2014 | 139 |       | 100 | 16  | 150      | 6      | 1      |            |        |
| Lorente'14    | 2014 | 139 |       | 100 | 15  | 134      | 3      | 0      |            |        |
| Manzano       | 2008 | 140 |       | 100 | 12  | 63       | 0      | 4      |            |        |
| Manzano       | 2008 | 140 |       | 100 | 9   | 64       | 0      | 2      |            |        |
| Martin        | 1993 | 141 |       | 100 | 4   | 66       | 2      | 0      |            |        |
| Martin        | 1993 | 141 |       | 100 | 4   | 65       | 0      | 1      |            |        |
| Morrow        | 2010 | 142 |       | 100 | 15  | 73       | 6      | 2      |            |        |
| Morrow        | 2010 | 142 |       | 100 | 15  | 73       | 0      | 3      |            |        |
| Nseir         | 2011 | 143 |       | 100 | 10  | 61       | 2      | 2      |            |        |
| Nseir         | 2011 | 143 |       | 100 | 12  | 61       | 0      | 1      |            |        |
| Pickworth     | 1993 | 144 | T     | 100 | 7   | 44       | 1      |        |            |        |
| Pneumatikos   | 2006 | 145 |       | 100 | 15  | 40       | 1      | 1      |            |        |
| Pneumatikos   | 2006 | 145 |       | 100 | 16  | 39       | 0      | 1      |            |        |
| Prod'hom_A    | 1994 | 146 |       | 100 | 6   | 81       | 4      | 0      |            |        |
| Prod'hom_R    | 1994 | 146 |       | 100 | 6   | 80       | 1      | 1      |            |        |
| Prod'hom_S    | 1994 | 146 |       | 100 | 5   | 83       | 1      | 0      |            |        |
| Reigneir      | 2013 | 147 |       | 100 | 7   | 222      | 9      |        |            |        |
| Reigneir      | 2013 | 147 |       | 100 | 7   | 227      | 12     |        |            |        |
| Ryan_C        | 1993 | 148 |       | 100 | 5   | 56       | 2      | 1      |            |        |
| Ryan_S        | 1993 | 148 |       | 100 | 6   | 58       | 1      | 0      |            |        |

**Table S2 (continued): *Pseudomonas* and *Acinetobacter* data: Groups of non decontamination studies <sup>a</sup>**

| author     | Year | Ref | Notes | MV% | LOS | Patients | VAP    |        | Bacteremia |        |
|------------|------|-----|-------|-----|-----|----------|--------|--------|------------|--------|
|            |      |     |       |     |     |          | v_ps_n | v_ac_n | b_ps_n     | b_ac_n |
|            |      |     |       |     | d   | n        |        |        |            |        |
| Smulders   | 2002 | 149 |       | 100 | 14  | 75       | 3      |        |            |        |
| Smulders   | 2002 | 149 |       | 100 | 12  | 75       | 1      |        |            |        |
| Staudinger | 2010 | 150 |       | 100 | 14  | 75       | 5      |        |            |        |
| Staudinger | 2010 | 150 |       | 100 | 8   | 75       | 3      |        |            |        |
| Thomachot  | 1998 | 151 |       | 100 | 12  | 66       | 3      | 1      |            |        |
| Thomachot  | 1998 | 151 |       | 100 | 12  | 70       | 2      | 1      |            |        |
| Thomachot  | 1999 | 152 |       | 100 | 11  | 77       | 1      | 0      |            |        |
| Thomachot  | 1999 | 152 |       | 100 | 12  | 63       | 2      | 0      |            |        |
| Thomachot  | 2002 | 153 |       | 100 | 10  | 84       | 2      | 0      |            |        |
| Thomachot  | 2002 | 153 |       | 100 | 9   | 71       | 0      | 1      |            |        |
| Valencia   | 2007 | 154 |       | 100 | 13  | 69       | 1      | 0      |            |        |
| Valencia   | 2007 | 154 |       | 100 | 13  | 73       | 3      | 1      |            |        |
| Valles     | 1995 | 155 |       | 100 | 6   | 77       | 12     |        |            |        |
| Valles     | 1995 | 155 |       | 100 | 12  | 76       | 12     |        |            |        |
| Walaszek   | 2017 | 156 |       | 100 | 5   | 804      | 5      | 39     |            |        |
| Walaszek   | 2017 | 156 |       | 100 | 5   | 1003     | 10     | 22     |            |        |

## Table S2 footnotes

T – Data originating from a study for which the majority of ICU admission were for trauma

NS – Not stated; LOS is mean or median length of ICU stay

v\_ps\_n is the count of *Pseudomonas* VAP and v\_ac\_n is the count of *Acinetobacter* VAP

b\_ps\_n is the count of *Pseudomonas* bacteremia and b\_ac\_n is the count of *Acinetobacter* bacteremia

Several (n = 47) of these studies were cited in the following source systematic reviews.

- Messori A, Trippoli S, Vaiani M, Gorini M, Corrado A: Bleeding and pneumonia in intensive care patients given ranitidine and sucralfate for prevention of stress ulcer: meta-analysis of randomised controlled trials. *BMJ* 2000, 321:1103–1106.
- Huang J, Cao Y, Liao C, Wu L, Gao F: Effect of histamine-2-receptor antagonists versus sucralfate on stress ulcer prophylaxis in mechanically ventilated patients: a meta-analysis of 10 randomized controlled trials. *Crit Care* 2010, 14:R194.
- Alhazzani W, Almasoud A, Jaeschke R, Lo BW, Sindi A, Altayyar S, Fox-Robichaud A: Small bowel feeding and risk of pneumonia in adult critically ill patients: a systematic review and meta-analysis of randomized trials. *Crit Care* 2013, 17:R127.
- Melsen WG, Rovers MM, Bonten MJM: Ventilator-associated pneumonia and mortality: A systematic review of observational studies. *Crit Care Med* 2009, 37:2709–2718.
- Safdar N, Dezfulian C, Collard HR, Saint S: Clinical and economic consequences of ventilator-associated pneumonia: a systematic review. *Crit Care Med* 2005, 33:2184–93.
- Han J, Liu Y. Effect of ventilator circuit changes on ventilator-associated pneumonia: a systematic review and meta-analysis. *Respiratory care*, 2010; 55: 467-474.



- Subirana M, Solà I, Benito S: Closed tracheal suction systems versus open tracheal suction systems for mechanically ventilated adult patients. *Cochrane Database Syst Rev* 2007, 4: CD004581;
- Siempos II, Vardakas KZ, Kopterides P, Falagas ME. Impact of passive humidification on clinical outcomes of mechanically ventilated patients: A meta-analysis of randomized controlled trials. *Crit Care Med* 2007; 35: 2843-51;
- Muscedere J, Rewa O, McKechnie K, Jiang X, Laporta D, Heyland DK. Subglottic secretion drainage for the prevention of ventilator-associated pneumonia: a systematic review and meta-analysis. *Crit Care Med* 2011; 39:1985–1991.
- Delaney A, Gray H, Laupland KB, Zuege DJ. Kinetic bed therapy to prevent nosocomial pneumonia in mechanically ventilated patients: a systematic review and meta-analysis. *Crit Care* 2006; 10:R70;
- Sud S, Friedrich JO, Taccone P, Polli F, Adhikari NK, Latini R, Gattinoni L. Prone ventilation reduces mortality in patients with acute respiratory failure and severe hypoxemia: systematic review and meta-analysis. *Inten Care Med* 2010; 36(4); 585-599.
- Siempos II, Vardakas KZ, Falagas ME. Closed tracheal suction systems for prevention of ventilator-associated pneumonia. *Brit J Anaesthesia*, 2008; 100(3): 299-306.

**Table S3: *Pseudomonas* and *Acinetobacter* data: Groups of anti-septic studies <sup>a</sup>**

| author           | Year | Ref | Notes | MV% | LOS | Patients | VAP    |        | Bacteremia |        |
|------------------|------|-----|-------|-----|-----|----------|--------|--------|------------|--------|
|                  |      |     |       |     |     |          | v_ps_n | v_ac_n | b_ps_n     | b_ac_n |
| Cabov            | 2010 | 157 |       | 57  | 6   | 30       | 4      | 0      | 0          | 0      |
| Cabov Chlx       | 2010 | 157 |       | 77  | 6   | 30       | 0      | 0      | 0          | 0      |
| Climo_NC         | 2013 | 158 |       | NS  | 6   | 1398     |        |        | 2          | 2      |
| Climo            | 2013 | 158 |       | NS  | 6   | 1410     |        |        | 4          | 1      |
| Fourrier'00      | 2000 | 159 |       | 100 | 24  | 30       | 4      | 2      | 0          | 0      |
| Fourrier'00 Chlx | 2000 | 159 |       | 100 | 18  | 30       | 1      | 2      | 0          | 1      |
| Fourrier'05      | 2005 | 160 |       | 100 | 13  | 114      | 5      | 0      | 0          | 0      |
| Fourrier'05 Chlx | 2005 | 160 |       | 100 | 14  | 114      | 6      | 1      | 1          | 0      |
| Huang_2pre       | 2013 | 48  |       | NS  | 3   | 15218    |        |        | 8          | 5      |
| Huang_3pre       | 2013 | 48  |       | NS  | 3   | 17356    |        |        | 11         | 10     |
| Huang_3UD        | 2013 | 48  |       | NS  | 3   | 26024    |        |        | 14         | 3      |
| Huang_2TD        | 2013 | 48  |       | NS  | 3   | 24752    |        |        | 13         | 2      |
| Koeman           | 2006 | 161 |       | 100 | 13  | 130      | 4      |        |            |        |
| Koeman-Ch        | 2006 | 161 |       | 100 | 14  | 127      | 0      |        |            |        |
| Koeman ChC       | 2006 | 161 |       | 100 | 13  | 128      | 2      |        |            |        |
| Kollef           | 2006 | 162 |       | 100 | 14  | 347      | 9      | 2      |            |        |
| Kollef Isegaran  | 2006 | 162 |       | 100 | 14  | 362      | 8      | 2      |            |        |
| Lorente          | 2012 | 163 |       | 100 | 9   | 219      | 5      | 0      |            |        |
| Lorente Chlx     | 2012 | 163 |       | 100 | 10  | 217      | 5      | 2      |            |        |
| Noto_pre         | 2015 | 164 |       | NS  | 3   | 4852     |        |        | 2          | 0      |
| Noto_Chlx BW     | 2015 | 164 |       | NS  | 3   | 4488     |        |        | 4          | 0      |
| Seguin – CC      | 2006 | 165 |       | 100 | 19  | 31       | 0      |        |            |        |
| Seguin – SC      | 2006 | 165 | T     | 100 | 14  | 31       | 1      |        |            |        |
| Seguin-PVI       | 2006 | 165 | T     | 100 | 15  | 36       | 0      |        |            |        |
| Seguin           | 2014 | 166 | T     | 100 |     |          |        |        |            |        |
| Seguin-PVI       | 2014 | 166 | T     | 100 |     |          |        |        |            |        |
| Swan             | 2016 | 167 |       | 100 | 7   | 70       | 1      | 0      | 0          | 0      |
| Swan Chlx BW     | 2016 | 167 |       | 100 | 7   | 63       | 1      | 1      | 0          | 0      |
| Wittekamp        | 2018 | 168 |       | 100 | 10  | 2251     |        |        | 21         |        |
| Wittekamp Chlx   | 2018 | 168 |       | 100 | 10  | 2108     |        |        | 16         |        |

Table S3: Footnotes

T – Data originating from a study for which the majority of ICU admission were for trauma

NS – Not stated; LOS is mean or median length of ICU stay

v\_ps\_n is the count of *Pseudomonas* VAP and v\_ac\_n is the count of *Acinetobacter* VAP

b\_ps\_n is the count of *Pseudomonas* bacteremia and b\_ac\_n is the count of *Acinetobacter* bacteremia

Several (n = 5) of these studies were cited in the following source meta-analyses.

- Chan EY, Ruest A, Meade MO, Cook DJ: Oral decontamination for prevention of pneumonia in mechanically ventilated adults: systematic review and meta-analysis. *BMJ* 2007, 334:889–900.
- Labeau SO, Van de Vyver K, Brusselaers N, Vogelaers D, Blot SI: Prevention of ventilator-associated pneumonia with oral antiseptics: a systematic review and meta-analysis. *Lancet Infect Dis* 2011, 11:845-854.
- Pileggi C, Bianco A, Flotta D, *et al.* Prevention of ventilator-associated pneumonia, mortality and all intensive care unit acquired infections by topically applied antimicrobial or antiseptic agents: a meta-analysis of randomized controlled trials in intensive care units. *Crit Care*. 2011; **15**: R155.
- Price R, MacLennan G, Glen J. Selective digestive or oropharyngeal decontamination and topical oropharyngeal chlorhexidine for prevention of death in general intensive care: systematic review and network meta-analysis. *BMJ*. 2014; **348**: g2197.
- Klompas M, Speck K, Howell MD, *et al.* Reappraisal of routine oral care with chlorhexidine gluconate for patients receiving mechanical ventilation: systematic review and meta-analysis. *JAMA Intern Med*. 2014; **174**: 751-61.

#### Intervention regimens abbreviations

Chlx = chlorhexidine; Chlx BW = chlorhexidine body wash; ChC = chlorhexidine and colistin; TD = targeted decolonization; UD = universal decolonization; PVI = povidone iodine; CC = concurrent control; SC = saline control; iseganan, is a synthetic variant of a porcine protegrin, which is a natural antibiotic peptide released by neutrophils in response to invasion by microbes [Kollef 2006, 162].

**Table S4: *Pseudomonas* and *Acinetobacter* data: Groups of studies of topical antibiotics <sup>a</sup>**

| author                 | PPAP | Year | Ref | Notes | MV% | LOS | Patients | VAP |   | Bacteremia |        |
|------------------------|------|------|-----|-------|-----|-----|----------|-----|---|------------|--------|
|                        |      |      |     |       |     |     |          | d   | n | v_ps_n     | v_ac_n |
| <b>groups with NCC</b> |      |      |     |       |     |     |          |     |   |            |        |
| Wittekamp PTNy         |      | 2018 | 168 |       | 100 | 10  | 2224     |     |   | 15         |        |
| Wittekamp PTNy         |      | 2018 | 168 |       | 100 | 11  | 2082     |     |   | 9          |        |
| Bergmans NC            |      | 2001 | 169 |       | 100 | 12  | 61       | 5   |   |            |        |
| Bergmans_PGV           |      | 2001 | 169 |       | 100 | 15  | 78       | 8   |   |            |        |
| Bergmans               |      | 2001 | 169 |       | 100 | 13  | 87       | 3   |   |            |        |
| Bonten NC              |      | 1994 | 170 |       | 91  | 16  | 54       | 4   |   |            |        |
| Bonten CC              |      | 1994 | 170 |       | 86  | 9   | 21       | 0   |   |            |        |
| Bonten_PTA             |      | 1994 | 170 |       | 100 | 13  | 22       | 0   |   |            |        |
| Camus                  |      | 2014 | 171 |       | 28  | 4   | 925      |     |   | 0          | 1      |
| Camus_PTA              |      | 2014 | 171 |       | 28  | 4   | 1022     |     |   | 3          | 0      |
| de Smet                |      | 2009 | 172 |       | 88  | 9   | 1990     |     |   | 36*        |        |
| de Smet_PTA            |      | 2009 | 172 |       | 94  | 9   | 1904     |     |   | 17*        |        |
| de Smet_PTA-Ctx        | +    | 2009 | 172 |       | 93  | 9   | 2045     |     |   | 16*        |        |
| Godard                 |      | 1990 | 173 |       | 80  | 13  | 84       | 5   |   |            |        |
| Godard_PT              |      | 1990 | 173 |       | 81  | 11  | 97       | 0   |   |            |        |
| Hartenauer_Ctx         | +    | 1991 | 174 |       | 100 | 12  | 40       | 7   | 1 | 1          |        |
| Hartenauer_Ctx         | +    | 1991 | 174 |       | 100 | 13  | 61       | 13  | 3 | 0          |        |
| Hartenauer_PTA-Ctx     | +    | 1991 | 174 |       | 100 | 17  | 50       | 0   | 0 | 0          |        |
| Hartenauer_PTA-Ctx     | +    | 1991 | 174 |       | 100 | 13  | 49       | 0   | 0 | 1          | 1      |
| Oostdijk               |      | 2011 | 175 |       | 88  | 9   | 1945     |     |   | 25*        |        |
| Oostdijk_PTA           |      | 2011 | 175 |       | 94  | 9   | 2166     |     |   | 16*        |        |
| Oostdijk_PTA-Ctx       | +    | 2011 | 175 |       | 93  | 9   | 2667     |     |   | 14*        |        |
| Stoutenbeek'84 NC      |      | 1984 | 176 |       | 100 | 14  | 59       | 5   | 1 | 1          | 0      |
| Stoutenbeek_PTA-Ctx    | +    | 1984 | 176 |       | 100 | 11  | 63       | 3   | 1 | 0          | 0      |
| Stoutenbeek'87 NC      |      | 1987 | 177 |       | 100 | 14  | 59       | 5   | 1 |            | 0      |
| Stoutenbeek_PTA        | +    | 1987 | 177 |       | 100 | 18  | 42       | 1   | 2 | 1          | 2      |
| Winter NC              |      | 1992 | 178 |       | 92  | 7   | 84       | 2   | 0 |            |        |

**Table S4(continued): *Pseudomonas* and *Acinetobacter* data: Groups of studies of topical antibiotics <sup>a</sup>**

| author                | PPAP | Year | Ref | Notes | MV% | LOS | Patients | VAP |    | Bacteremia |        |
|-----------------------|------|------|-----|-------|-----|-----|----------|-----|----|------------|--------|
|                       |      |      |     |       |     |     |          | d   | n  | v_ps_n     | v_ac_n |
| <b>groups with CC</b> |      |      |     |       |     |     |          |     |    |            |        |
| Winter CC             |      | 1992 | 178 |       | 92  | 8   | 92       | 8   | 2  |            |        |
| Winter_PTA-Cz         | +    | 1992 | 178 |       | 92  | 6   | 91       | 3   | 0  |            |        |
| Abele-Horn            |      | 1997 | 179 | T     | 100 | 22  | 30       | 3   | 0  |            |        |
| Abele-Horn_PTA-Ctx    | +    | 1997 | 179 | T     | 100 | 18  | 58       | 2   | 0  |            |        |
| Acquarolo             |      | 2005 | 180 |       | 100 | 13  | 19       | 2   | 0  | 0          |        |
| Acquarolo_AmpSul      | +    | 2005 | 180 |       | 100 | 13  | 19       | 2   | 0  | 0          |        |
| Aerdt                 |      | 1991 | 181 |       | 100 | 28  | 39       | 10  | 3  |            |        |
| Aerdt_PNoA-Ctx        | +    | 1991 | 181 |       | 100 | 23  | 17       | 0   | 0  |            |        |
| Bion_-Ctx             | +    | 1991 | 182 |       | 50  | 2   | 31       | 3   | 0  | 0          | 0      |
| Bion_PTA-Ctx          | +    | 1991 | 182 |       | 50  | 2   | 21       | 0   | 0  | 2          | 0      |
| Blair                 |      | 1991 | 183 |       | 93  | 8   | 130      | 9   |    | 3          |        |
| Blair_PTA-Ctx         | +    | 1991 | 183 |       | 93  | 8   | 126      | 1   |    | 1          |        |
| Cockerill             |      | 1992 | 184 |       | 85  | 12  | 75       | 4   |    |            |        |
| Cockerill_PGNy-Ctx    | +    | 1992 | 184 |       | 85  | 10  | 75       | 1   |    |            |        |
| de la Cal             |      | 2005 | 185 | T     | 80  | 34  | 54       | 7   | 5  | 7          | 3      |
| de la Cal_PTA-Ctx     | +    | 2005 | 185 | T     | 74  | 31  | 53       | 2   | 6  | 9          | 6      |
| Ferrer_Ctx            | +    | 1994 | 186 |       | 100 | 14  | 41       | 4   | 0  | 0          | 0      |
| Ferrer_PTA-Ctx        | +    | 1994 | 186 |       | 100 | 15  | 39       | 1   | 0  | 1          | 0      |
| Georges               |      | 1994 | 187 |       | 100 | 16  | 33       |     | 0  |            |        |
| Georges_PNeA          |      | 1994 | 187 |       | 100 | 16  | 31       |     | 1  |            |        |
| Hammond_Ctx           | +    | 1993 | 188 |       | 100 | 21  | 20       |     | 1  |            |        |
| Hammond_PTA-Ctx       | +    | 1993 | 188 |       | 100 | 30  | 13       |     | 0  |            |        |
| Hammond_Ctx           | +    | 1994 | 189 |       | 100 | 6   | 33       | 0   | 0  |            |        |
| Hammond_PTA-Ctx       | +    | 1994 | 189 |       | 100 | 7   | 39       | 0   | 1  |            |        |
| Jacobs                |      | 1992 | 190 |       | 100 | 10  | 43       | 0   | 0  | 0          | 0      |
| Jacobs_PTA-Ctx        | +    | 1992 | 190 |       | 100 | 9   | 36       | 0   | 0  | 0          | 1      |
| Karvouniaris          |      | 2015 | 191 |       | 100 | 13  | 84       |     | 11 |            |        |
| Karvouniaris_P        |      | 2015 | 191 |       | 100 | 16  | 84       |     | 2  |            |        |
| Korinek               |      | 1993 | 192 |       | 100 | 27  | 60       | 3   | 1  |            |        |
| Korinek_PTA-V         |      | 1993 | 192 |       | 100 | 25  | 63       | 0   | 1  |            |        |
| Laggner               |      | 1994 | 193 |       | 100 | 20  | 34       | 1   |    | 1          | 0      |
| Laggner_GA            |      | 1994 | 193 |       | 100 | 16  | 33       | 0   |    | 0          | 0      |
| Palomar               |      | 1997 | 194 |       | 100 | 6   | 42       | 6   | 0  |            |        |
| Palomar Ctx           | +    | 1997 | 194 |       | 100 | 8   | 46       | 1   | 2  |            |        |
| Palomar_PTA-Ctx       | +    | 1997 | 194 |       | 100 | 11  | 41       | 1   | 0  |            |        |
| Pneumatikos           |      | 2002 | 195 | T     | 100 | 23  | 30       | 1   | 1  |            |        |
| Pneumatikos_PTA       |      | 2002 | 195 | T     | 100 | 16  | 31       | 0   | 1  |            |        |

**Table S4(continued): *Pseudomonas* and *Acinetobacter* data: Groups of studies of topical antibiotics**

| author                                | PPAP | Year | Ref | Notes | MV% | LOS | Patients | VAP |    | Bacteremia |        |
|---------------------------------------|------|------|-----|-------|-----|-----|----------|-----|----|------------|--------|
|                                       |      |      |     |       |     |     |          | d   | n  | v_ps_n     | v_ac_n |
| <b>groups with CC</b>                 |      |      |     |       |     |     |          |     |    |            |        |
| Quinio                                |      | 1995 | 196 | T     | 100 | 16  | 72       | 12  |    | 0          | 0      |
| Quinio_PGA                            |      | 1995 | 196 | T     | 100 | 16  | 76       | 5   |    | 0          | 0      |
| Rocha                                 |      | 1992 | 197 | T     | 100 | 18  | 54       | 8   | 4  | 1          | 3      |
| Rocha_PTA-Ctx                         | +    | 1992 | 197 | T     | 100 | 19  | 47       | 1   | 1  | 0          | 0      |
| Rodríguez-Roldán                      |      | 1990 | 198 |       | 100 | 10  | 15       | 5   | 2  |            |        |
| Rodríguez-Roldán_PTNeA                |      | 1990 | 198 |       | 100 | 10  | 13       | 0   | 0  |            |        |
| Rolando_CtxFlux                       |      | 1996 | 199 |       | 73  | 7   | 61       | 2   | 0  | 0          | 0      |
| Rolando_PTA_CtxFlux                   | +    | 1996 | 199 |       | 73  | 7   | 47       | 1   | 0  | 0          | 0      |
| Rolando '93                           | +    | 1993 | 200 |       | 75  | 8   | 31       | 2   | 0  |            |        |
| Rolando_PTAM-Cfu                      | +    | 1993 | 200 |       | 75  | 8   | 28       | 1   | 0  |            |        |
| Sirvent                               |      | 1997 | 201 |       | 100 | 16  | 50       | 1   | 2  |            |        |
| Sirvent_Cef                           | +    | 1997 | 201 |       | 100 | 13  | 50       | 3   | 1  |            |        |
| Smith_CtxAmp                          | +    | 1993 | 202 |       | 100 | 8   | 18       | 1   |    |            |        |
| Smith_PTA_CtxAmp                      | +    | 1993 | 202 |       | 100 | 7   | 18       | 0   |    |            |        |
| Stoutenbeek                           |      | 2007 | 203 | T     | 100 | 12  | 200      | 28  | 23 | 2          | 3      |
| Stoutenbeek_PTA-Ctx                   | +    | 2007 | 203 | T     | 100 | 13  | 201      | 11  | 15 | 3          | 0      |
| Unertl                                |      | 1987 | 204 |       | 100 | 23  | 20       | 2   |    |            |        |
| Unertl_PGA                            |      | 1987 | 204 |       | 100 | 18  | 19       | 0   |    |            |        |
| Verwaest                              |      | 1997 | 205 |       | 100 | 19  | 185      | 7   | 4  | 1          | 2      |
| Verwaest OA_O                         | +    | 1997 | 205 |       | 100 | 17  | 193      | 2   | 4  | 2          | 2      |
| Verwaest_PTA-Ctx                      | +    | 1997 | 205 |       | 100 | 22  | 200      | 10  | 4  | 6          | 2      |
| Wiener                                |      | 1995 | 206 |       | 100 | 11  | 31       | 0   | 0  |            |        |
| Wiener_PGNy                           |      | 1995 | 206 |       | 100 | 11  | 30       | 2   | 1  |            |        |
| <b>Studies without control groups</b> |      |      |     |       |     |     |          |     |    |            |        |
| Frencken_PTA-Ctx                      | +    | 2014 | 207 |       | 100 | 7   | 1874     |     |    | 15         |        |
| Garbino_PNeV                          |      | 2002 | 208 |       | 100 | 9   | 204      | 4   |    |            |        |
| Leone_PTA-Cef                         | +    | 2002 | 209 |       | 100 | 6   | 324      | 3   | 5  |            |        |
| Nardi_PTA                             |      | 2001 | 210 | T     | 100 | 12  | 104      | 4   | 1  |            |        |
| Nardi_PTAM                            |      | 2001 | 210 | T     | 100 | 11  | 119      | 3   | 0  |            |        |
| Oostdijk_PTA                          |      | 2014 | 211 |       | 52  | 6   | 5508     |     |    | 23         | 3      |
| Oostdijk_PTA-Ctx                      | +    | 2014 | 211 |       | 51  | 6   | 5483     |     |    | 20         | 1      |
| Rouby_P                               |      | 1994 | 212 |       | 100 | 12  | 347      | 12  |    |            |        |
| Rouby E                               |      | 1994 | 212 |       | 100 | 18  | 251      | 26  |    |            |        |
| Silvestri_PTA-Ctx                     | +    | 1999 | 213 |       | 100 | 9   | 117      | 2   |    | 0          |        |
| Steffen_PTNY-Ctx                      | +    | 1994 | 214 |       | 100 | 14  | 127      |     |    | 1          | 0      |

Table S4: Footnotes

T – Data originating from a study for which the majority of ICU admission were for trauma

NS – Not stated; LOS is mean or median length of ICU stay; PPAP is use of protocolized parenteral antibiotic prophylaxis

v\_ps\_n is the count of *Pseudomonas* VAP and v\_ac\_n is the count of *Acinetobacter* VAP

b\_ps\_n is the count of *Pseudomonas* bacteremia and b\_ac\_n is the count of *Acinetobacter* bacteremia

\* De Smet 2009 [172] The *Pseudomonas* and *Acinetobacter* counts in this study are available only as a combined category count for gram negative non-fermentative GNB and are provided here for reference but are not used in the analysis. The *Pseudomonas* counts in the study of Oostdijk [175] includes counts from the study by De Smet 2009 [172]. The *Pseudomonas* counts in the study of Oostdijk [175] are taken as given in Table 2 of Oostdijk [175] even though this Table appears to be mislabelled in comparison to the text and table 1 of Oostdijk [175] and in relation to the data in De Smet 2009 [172].

The control group in one study by Stoutenbeek [176] appears also as the control group in another study by this author [177] and is used only once in the analysis here.

Several (n = 24) of these studies were cited in the following source systematic reviews.

- Liberati A, D'Amico R, Pifferi S, Torri V, Brazzi L, Parmelli E: Antibiotic prophylaxis to reduce respiratory tract infections and mortality in adults receiving intensive care. *Cochrane Database Syst Rev* 2009, 4.
- Pileggi C, Bianco A, Flotta D, Nobile CG, Pavia M. Prevention of ventilator-associated pneumonia, mortality and all intensive care unit acquired infections by topically applied antimicrobial or antiseptic agents: a meta-analysis of randomized controlled trials in intensive care units. *Crit Care* 2011; 15:R155.
- Silvestri L, Van Saene HK, Milanese M, Gregori D. Impact of selective decontamination of the digestive tract on fungal carriage and infection: systematic review of randomized controlled trials. *Intensive Care Med* 2005, 31:898-910.
- Chan EY, Ruest A, Meade MO, Cook DJ. Oral decontamination for prevention of pneumonia in mechanically ventilated adults: systematic review and meta-analysis. *BMJ*. 2007; 334:889–900.

TAP intervention regimens abbreviations; PTA (=P, topical polymyxin; T, topical tobramycin; A, topical amphotericin); PTA-Ctx (=P, topical polymyxin; T, topical tobramycin; A, topical amphotericin; Ctx, parenteral cephalosporin); P (P = polymyxin either aerosolized or topical); PNeV (P = polymyxin; Ne = Neomycin; V = Vancomycin); PGA-Ctx (=P, topical polymyxin; G, topical gentamicin; A, topical amphotericin; Ctx, parenteral cephalosporin); PTAM (=P, topical polymyxin; T, topical tobramycin; A, topical amphotericin; topical mupirocin); E (=E, topical erythromycin); PNoA-Ctx (=P, topical polymyxin; No, topical norfloxacin; A, topical amphotericin; Ctx, parenteral cephalosporin); PGV (=P, topical polymyxin; G, topical gentamicin; V, topical vancomycin); PGNy-Ctx (=P, topical polymyxin; G, topical gentamicin; Ny, topical nystatin; Ctx, parenteral cephalosporin); P-Ctx (=P, topical polymyxin; Ctx, parenteral cephalosporin); PTAV (=P, topical polymyxin; T, topical tobramycin; A, topical amphotericin; V, topical vancomycin); PGA (=P, topical polymyxin; G, topical gentamicin; A, topical amphotericin); PTNeA (=P, topical polymyxin; T, topical tobramycin; Ne, topical Neomycin; A, topical amphotericin); PGNy (=P, topical polymyxin; G, topical gentamicin; Ny, topical nystatin); PTA-Cz (=P, topical polymyxin; T, topical tobramycin; A, topical amphotericin; Cz, parenteral Ceftazidime).

**Table S5: Development of GSEM model <sup>a</sup>**

|                                     | <u>Model 1</u> | <u>Model 2</u> | <u>Model 3</u> | <u>Model 4</u> | <u>Model 5</u> | <u>Model 7</u> | <u>Model 6</u> |                |
|-------------------------------------|----------------|----------------|----------------|----------------|----------------|----------------|----------------|----------------|
|                                     | <u>Fig S8</u>  | <u>Fig S9</u>  | <u>Fig S10</u> | <u>Fig S11</u> | <u>Fig S12</u> | <u>Fig S12</u> | <u>Fig S13</u> | <u>95%CI</u>   |
| <b><u>Factor</u></b> <sup>b-j</sup> |                |                |                |                |                |                |                |                |
| <b><u>b_Ps_n</u></b>                |                |                |                |                |                |                |                |                |
| <b>Pseudomonas</b>                  | 1              | 1              | 1              | 1              | 1              | 1              | 1              | (constrained)  |
| <b>ppap</b>                         |                |                | 1.11**         | 0.97**         | 0.97**         | 1.00**         | 0.95**         | 0.27 to 1.61   |
| <b>_cons</b>                        | -5.18***       | -5.19***       | -5.38***       | -6.00***       | -6.00***       | -6.05***       | -6.05***       | -6.6 to -5.4   |
| <b><u>b_Ac_n</u></b>                |                |                |                |                |                |                |                |                |
| <b>Acinetobacter</b>                | 1              | 1              | 1              | 1              | 1              | 1              | 1              | (constrained)  |
| <b>ppap</b>                         |                |                | 0.6            | 0.46           | 0.48           | 0.44           | 0.47           | -0.51 to 4639  |
| <b>_cons</b>                        | -6.74***       | -6.74***       | -6.83***       | -7.38***       | -7.44***       | -7.47***       | -7.47***       | -8.0 to -7.0   |
| <b><u>v_Ps_n</u></b>                |                |                |                |                |                |                |                |                |
| <b>Pseudomonas</b>                  | 0.67***        | 0.67***        | 0.71***        | 0.80***        | 0.80***        | 0.81***        | 0.81***        | 0.51 to 1.09   |
| <b>mvp90</b>                        | 0.55*          | 0.54*          | 0.49*          | 0.43           | 0.43           | 0.48*          | 0.49*          | 0.03 to 0.92   |
| <b>non_D</b>                        | -0.37*         | -0.58***       | -0.61***       | -0.60***       | -0.60***       | -0.54***       | -0.54***       | -0.79 to -0.31 |
| <b>_cons</b>                        | -3.63***       | -3.63***       | -3.56***       | -4.17***       | -4.17***       | -4.24***       | -4.25***       | -4.7 to -3.7   |
| <b><u>v_Ac_n</u></b>                |                |                |                |                |                |                |                |                |
| <b>Acinetobacter</b>                | 0.73***        | 0.73***        | 0.74***        | 0.83***        | 0.83***        | 0.83***        | 0.83***        | +0.66 to 1.01  |
| <b>mvp90</b>                        | 0.79*          | 0.79*          | 0.73           | 0.71           | 0.69           | 0.71           | 0.7            | -0.12 to 1.55  |
| <b>non_D</b>                        | -0.35          | -0.31          | -0.33          | -0.27          | -0.21          | -0.17          | -0.17          | -0.56 to 0.23  |
| <b>_cons</b>                        | -5.13***       | -5.13***       | -5.06***       | -5.79***       | -5.85***       | -5.88***       | -5.87***       | -6.8 to -4.9   |
| <b><u>Pseudomonas</u></b>           |                |                |                |                |                |                |                |                |
| <b>TAP</b>                          | -0.65**        | -0.65**        | -0.67***       | -0.68***       | -0.68***       | -0.47*         | -0.57***       | -0.91 to -0.29 |
| <b>a_S</b>                          | -1.34***       | -1.33***       | -1.20***       | -1.01***       | -1.00***       | -0.94***       | -0.93***       | -1.46 to -0.46 |
| <b>eap</b>                          |                |                |                |                |                | -0.21          |                |                |
| <b>ppap</b>                         | 0.27           | 0.27           |                |                |                |                |                |                |
| <b>non_D</b>                        | -0.33          |                |                |                |                |                |                |                |
| <b>los7</b>                         |                |                |                | 1.03***        | 1.03***        | 0.96***        | 0.97***        | 0.53 to 1.45   |
| <b>trauma50</b>                     |                |                |                |                | 0.04           | 0.03           | 0.02           | -0.33 to 0.36  |
| <b>CC</b>                           |                |                |                |                |                | 0.56**         | 0.56**         | 0.08 to 1.10   |



**Table S5: Development of GSEM model (continued) <sup>a</sup>**

|                                      | <u>Model 1</u> | <u>Model 2</u> | <u>Model 3</u> | <u>Model 4</u> | <u>Model 5</u> | <u>Model 7</u> | <u>Model 6</u> |               |
|--------------------------------------|----------------|----------------|----------------|----------------|----------------|----------------|----------------|---------------|
|                                      | <u>Fig S8</u>  | <u>Fig S9</u>  | <u>Fig S10</u> | <u>Fig S11</u> | <u>Fig S12</u> | <u>Fig S12</u> | <u>Fig S13</u> | <u>95%CI</u>  |
| <b>Factor <sup>b-j</sup></b>         |                |                |                |                |                |                |                |               |
| <b><u>Acinetobacter</u></b>          |                |                |                |                |                |                |                |               |
| TAP                                  | -0.25          | -0.25          | -0.27          | -0.27          | -0.5           | -0.58          | -0.43          | -1.04 to 0.15 |
| a_S                                  | -1.26*         | -1.27*         | -1.21*         | -1.04*         | -0.85          | -0.8           | -0.82          | -1.83 to 0.19 |
| eap                                  |                |                |                |                |                | 0.25           |                |               |
| ppap                                 | 0.1            | 0.1            |                |                |                |                |                |               |
| non_D                                | 0.06           |                |                |                |                |                |                |               |
| los7                                 |                |                |                | 1.15***        | 1.01***        | 0.99***        | 0.98***        | 0.41 to 1.54  |
| trauma50                             |                |                |                |                | 1.09***        | 1.04***        | 1.04***        | 0.47 to 1.62  |
| CC                                   |                |                |                |                |                | 0.42           | 0.42           | -0.22 to 1.22 |
|                                      |                |                |                |                |                |                |                |               |
| <b><u>Error terms</u></b>            |                |                |                |                |                |                |                |               |
| var(e.Ps_GO)                         | 1.32*          | 1.32*          | 1.17**         | 0.76**         | 0.76**         | 0.71**         | 0.72**         | 0.36 to 1.47  |
| var(e.Ac_GO)                         | 2.66***        | 2.66***        | 2.56***        | 1.92***        | 1.62***        | 1.60***        | 1.60***        | 1.01 to 2.48  |
|                                      |                |                |                |                |                |                |                |               |
| <b><u>Model fit <sup>k</sup></u></b> |                |                |                |                |                |                |                |               |
| AIC                                  | 3345.94        | 3344.15        | 3329.29        | 3274.57        | 3261.55        | 3259.1         | 3255.53        |               |
| N                                    | 22             | 20             | 20             | 22             | 24             | 28             | 26             |               |
| Groups (n)                           | 334            | 334            | 334            | 334            | 334            | 334            | 334            |               |
| Clusters (n)                         | 213            | 213            | 213            | 213            | 213            | 213            | 213            |               |

Footnotes

- a. Legend: \* p<0.05; \*\* p<0.01; \*\*\* p<0.001
- b. v\_ps\_n is the count of *Pseudomonas* VAP; v\_ac\_n is the count of *Acinetobacter* VAP; b\_ps\_n is the count of *Pseudomonas* bacteremia and b\_ac\_n is the count of *Acinetobacter* bacteremia
- c. PPAP is the group wide use of protocolized parenteral antibiotic prophylaxis; tap is topical antibiotic prophylaxis; eap is enteral antibiotic prophylaxis
- d. Acinetobacter GO is the Acinetobacter gut overgrowth latent variable
- e. Pseudomonas GO is the Pseudomonas gut overgrowth latent variable
- f. MVP90 is use of mechanical ventilation by more than 90% of the group
- g. LOS7 is a mean or median length of ICU stay for the group of 7 days or greater
- h. Trauma ICU arbitrarily defined as an ICU for which >50% of admissions were for trauma
- i. CC is concurrency of control groups with an intervention group receiving TAP
- j. Less than 90% of the group receiving prolonged mechanical ventilation.
- k. Model fit; AIC is Akaike’s information criteria. This indicates model fit taking into account the statistical goodness of fit and the number of parameters in the model. Lower values of AIC indicate a better model fit. N is the number of parameters in the model.

**Table S6: VAP count data**<sup>a</sup>

|                                              | Observational studies                  | Infection prevention studies       |                                  |                                    |
|----------------------------------------------|----------------------------------------|------------------------------------|----------------------------------|------------------------------------|
|                                              | (no intervention)                      | Non-dec                            | Anti-septic                      | TAP ±PPAP                          |
| <u>Excluding groups with LOS &lt; 7 days</u> |                                        |                                    |                                  |                                    |
| <u>Acinetobacter</u>                         |                                        |                                    |                                  |                                    |
| CC or observational groups                   | 586/37026 <sup>b,c</sup><br>1.6% (67)  | 30/2620 <sup>b</sup><br>1.1% (25)  | 4/780 <sup>b</sup><br>0.5% (5)   | 67/1521 <sup>b</sup><br>4.4% (25)  |
| Intervention groups                          |                                        | 34/2429 <sup>c</sup><br>1.4% (24)  | 8/786 <sup>c</sup><br>1.0% (5)   | 41/1721 <sup>c</sup><br>2.4% (26)  |
| <u>Pseudomonas</u>                           |                                        |                                    |                                  |                                    |
| CC or observational groups                   | 2217/60131 <sup>d,e</sup><br>3.7% (81) | 200/4288 <sup>d</sup><br>4.7% (38) | 27/914 <sup>d</sup><br>3.0% (8)  | 179/2161 <sup>d</sup><br>8.3% (34) |
| Intervention groups                          |                                        | 167/4169 <sup>e</sup><br>4.0% (37) | 24/1027 <sup>e</sup><br>2.3% (8) | 106/3193 <sup>e</sup><br>3.3% (37) |

## Footnotes to table S6

- Non-dec = Non-decontamination studies; TAP = Topical antibiotic prophylaxis; PPAP = Protocolized parenteral antibiotic prophylaxis.
- The counts of *Acinetobacter* VAP among the three categories of control groups and the category of observation groups among studies after excluding those with length of stay < 7 days differed significantly ( $p < 0.001$ ; Fisher's exact test)
- The counts of *Acinetobacter* VAP among the three categories of intervention groups and the category of observation groups among studies after excluding those with length of stay < 7 days differed significantly ( $p = 0.038$ ; Fisher's exact test)
- The counts of *Pseudomonas* VAP among the three categories of control groups and the category of observation groups among studies after excluding those with length of stay < 7 days differed significantly ( $p < 0.001$ ; Fisher's exact test)
- The counts of *Pseudomonas* VAP among the three categories of intervention groups and the category of observation groups among studies after excluding those with length of stay < 7 days was differed marginally ( $p = 0.05$ ; Fisher's exact test)

**Table S7: Bacteremia count data <sup>a</sup>**

|                                            | Observational studies                   | Infection prevention studies   |                                  |                                        |
|--------------------------------------------|-----------------------------------------|--------------------------------|----------------------------------|----------------------------------------|
|                                            | (no intervention)                       | Non-dec                        | Anti-septic                      | TAP ±PPAP                              |
| <u>All groups</u>                          |                                         |                                |                                  |                                        |
| <u>Acinetobacter</u>                       |                                         |                                |                                  |                                        |
| CC or observational groups                 | 203/189338<br>0.11% (20)                | 1/553<br>0.18% (2)             | 17/39162<br>0.04% (8)            | 15/1860<br>0.8% (13)                   |
| Intervention groups                        |                                         | 1/526<br>0.19% (2)             | 7/57009<br>0.01% (8)             | 15/13290 <sup>b</sup><br>0.11% (18)    |
| <u>Pseudomonas</u>                         |                                         |                                |                                  |                                        |
| CC or observational groups                 | 567/192203<br>0.30% (27)                | 2/553<br>0.36% (2)             | 23/39162<br>0.06% (8)            | 63/5280<br>1.2% (16)                   |
| Intervention groups                        |                                         | 3/526<br>0.57% (2)             | 52/59117<br>0.09% (9)            | 139/23543<br>0.59% (25)                |
| <u>Excluding groups with LOS&lt;7 days</u> |                                         |                                |                                  |                                        |
| <u>Acinetobacter</u>                       |                                         |                                |                                  |                                        |
| CC or observational groups                 | 37/12913 <sup>c, d</sup><br>0.29% (11)  | 0/200 <sup>c</sup><br>0% (1)   | 0/308 <sup>c</sup><br>0% (3)     | 14/904 <sup>c</sup><br>1.5% (11)       |
| Intervention groups                        |                                         | 1/199 <sup>d</sup><br>0.5% (1) | 1/305 <sup>d</sup><br>0.33% (3)  | 11/1256 <sup>d</sup><br>0.88% (14)     |
| <u>Pseudomonas</u>                         |                                         |                                |                                  |                                        |
| CC or observational groups                 | 111/14453 <sup>e, f</sup><br>0.77% (16) | 0/200 <sup>e</sup><br>0% (1)   | 0/308 <sup>e</sup><br>0.0% (3)   | 63/5249 <sup>e</sup><br>1.2% (15)      |
| Intervention groups                        |                                         | 2/199 <sup>f</sup><br>1.0% (1) | 17/2413 <sup>f</sup><br>0.7% (4) | 94/12531 <sup>f, g</sup><br>0.75% (22) |

Footnotes to table S7

- a. Non-dec = Non-decontamination studies; TAP = Topical antibiotic prophylaxis; PPAP = Protocolized parenteral antibiotic prophylaxis.
- b. Among intervention groups of TAP based prevention studies, the count of *Acinetobacter* bacteremias was 12/6609 (0.18%; 13 studies) versus 3/6681 (0.04%; 4 studies) for those using versus not including PPAP in the intervention (p = 0.02, Fisher’s exact test)

- c. The counts of *Acinetobacter* bacteremias among the three categories of control groups and the category of observation groups among studies after excluding those with length of stay <7 days differed significantly ( $p < 0.001$ ; Fisher's exact test)
- d. The counts of *Acinetobacter* bacteremias among the three categories of intervention groups and the category of observation groups among studies after excluding those with length of stay <7 days differed significantly ( $p = 0.012$ ; Fisher's exact test)
- e. The counts of *Pseudomonas* bacteremias among the three categories of control groups and the category of observation groups among studies after excluding those with length of stay <7 days differed significantly ( $p = 0.010$ ; Fisher's exact test)
- f. The counts of *Pseudomonas* bacteremias among the three categories of intervention groups and the category of observation groups among studies after excluding those with length of stay <7 days was not significantly different ( $p = 0.90$ ; Fisher's exact test)
- g. Among intervention groups of TAP based prevention studies excluding those with a LOS less than 7 days, the count of *Pseudomonas* bacteremias was 53/5908 (0.9%; 16 studies) versus 41/6623 (0.62%; 6 studies) for those using versus not including PPAP in the intervention ( $p = 0.07$ , Fisher's exact test)

## **Details of methods used in additional analyses**

### **Benchmarking: visual**

Caterpillar plots were generated to facilitate a visual benchmark of the *Pseudomonas* bacteremia and *Acinetobacter* bacteremia incidence proportion and these were generated as follows. The data for each bacteremia incidence proportion were logit transformed to generate caterpillar plots using the ‘metan’ command in STATA (release 12.0, STATA Corp., College Station, TX, USA). For *Pseudomonas* bacteremia this transformation proceeds as follows; with the number of mechanically ventilated patients as the denominator (D), the number of patients with *Pseudomonas* bacteremia as the numerator (N), and R being the *Pseudomonas* bacteremia proportion (N/D), the logit(*Pseudomonas* bacteremia) is  $\log(N/(D-N))$  and its variance is  $1/(D*R*(1-R))$ . Note that for any group with a zero event rate (N=0), the addition of the continuity correction (i.e. N+0.5) is required to avoid indeterminate transformations of the logit proportion and its variance. The visual benchmarks are the summary incidences for each of the *Pseudomonas* bacteremia and *Acinetobacter* bacteremia as derived using the observational studies. These visual benchmarks were then used in the respective caterpillar plots of the component groups from the VAP prevention studies as a reference line.

Dot plots were used to provide an ‘at a glance’ summary of the entire evidence base. These were derived as above for caterpillar plots but without the confidence limits. In dot plots, any group with a zero event rate (N=0) was arbitrarily assigned a low finite value (either 0.1%, 0.02% or 0.01%, depending on the spread of values). In the dot plots, a benchmark derived from the caterpillar plot as described above is used.

### **Meta-analysis: Effect sizes**

The study specific and overall summary effect sizes and associated 95% confidence interval for each of the antibiotic, antiseptic and non-decontamination based interventions against either VAP overall or bacteremia overall were calculated using the Der Simonian-Laird random-effect methods of meta-analysis using the ‘metan’ command in Stata 14.2 (Stata Corp., College Station, TX, USA).

References

- S1. A'Court CH, Garrard CS, Crook D, Bowler I, Conlon C, Peto T, Anderson E: Microbiological lung surveillance in mechanically ventilated patients, using non-directed bronchial lavage and quantitative culture. *Q J Med.* 1993;86:635-48.
- S2. Alvarez-Lerma F, ICU-acquired Pneumonia Study Group. Modification of empiric antibiotic treatment in patients with pneumonia acquired in the intensive care unit. *Intens Care Med.* 1996;22(5):387-94.
- S3. Antonelli M, Moro ML, Capelli O, De Blasi RA, D'Errico RR, Conti G, Bufi M, Gasparetto A: Risk factors for early onset pneumonia in trauma patients. *Chest.* 1994;105:224-228
- S4. Apostolopoulou E, Bakakos P, Katostaras T, Gregorakos L: Incidence and risk factors for ventilator-associated pneumonia in 4 multidisciplinary intensive care units in Athens, Greece. *Respir Care.* 2003;48: 681-688.
- S5. Baraibar J, Correa H, Mariscal D, Gallego M, Valles J, Rello J. Risk factors for infection by *Acinetobacter baumannii* in intubated patients with nosocomial pneumonia. *Chest.* 1997; 112:1050-1054.
- S6. Beck-Sague CM, Sinkowitz RL, Chinn RY, Vargo J, Kaler W, Jarvis WR: Risk factors for ventilator-associated pneumonia in surgical intensive-care-unit patients. *Infect Control Hosp Epidemiol.* 1996;17:374-6.
- S7. Bekaert M, Timsit JF, Vansteelandt S, Depuydt P, Vésin A, Garrouste-Orgeas M, Decruyenaere J, Clec'h C, Azoulay E, Benoit D. Attributable mortality of ventilator-associated pneumonia: a reappraisal using causal analysis. *American journal of respiratory and critical care medicine.* 2011;184(10):1133-9.
- S8. Bercault N, Boulain T: Mortality rate attributable to ventilator-associated nosocomial pneumonia in an adult intensive care unit: a prospective case-control study. *Crit Care Med.* 2001;29:2303-2309
- S9. Berrouane Y, Daudenthun I, Riegel B, Emery MN, Martin G, Krivosic R, Grandbastien B. Early onset pneumonia in neurosurgical intensive care unit patients. *J Hosp Infect.* 1998;40(4):275-80.
- S10. Bochicchio GV, Joshi M, Bochicchio K, Tracy K, Scalea TM: A time-dependent analysis of intensive care unit pneumonia in trauma patients. *J Trauma.* 2004;56:296-301.
- S11. Bonten MJ, Gaillard CA, van Tiel FH, Smeets HG, van der Geest S, Stobberingh EE: The stomach is not a source for colonization of the upper respiratory tract and pneumonia in ICU patients. *Chest.* 1994;105(3):878-84.
- S12. Boots RJ, Phillips GE, George N, Faoagali JL. Surveillance culture utility and safety using low-volume blind bronchoalveolar lavage in the diagnosis of ventilator-associated pneumonia. *Respirology.* 2008;13:87-96.
- S13. Boots RJ, Phillips GE, George N, Faoagali JL: Surveillance culture utility and safety using low-volume blind bronchoalveolar lavage in the diagnosis of ventilator-associated pneumonia. *Respirology.* 2008;13:87-96
- S14. Bornstain C, Azoulay E, De Lassence A, Cohen Y, Costa MA, Mourvillier B, Descorps-Declere A, Garrouste-Orgeas M, Thuong M, Schlemmer B, Timsit JF: Sedation, sucralfate, and antibiotic use are potential means for protection against early-onset ventilator-associated pneumonia. *Clin Infect Dis.* 2004;38(10):1401-8.
- S15. Braun SR, Levin AB, Clark KL. Role of corticosteroids in the development of pneumonia in mechanically ventilated head-trauma victims. *Crit Care Med* 1986;14:198-201
- S16. Bregeon F, Papazian L, Visconti A, Gregoire R, Thirion X, Gouin F: Relationship of microbiologic diagnostic criteria to morbidity and mortality in patients with ventilator-associated pneumonia. *JAMA.* 1997;277: 655-662
- S17. Bronchard R, Albaladejo P, Brezac G, et al. Early onset pneumonia: risk factors and consequences in head trauma patients. *Anesthesiology* 2004;100:234-9.

- S18. Cade JF, McOwat E, Sigamoria R, Keighley C, Presneill J, Sinickas V: Uncertain relevance of gastric colonization in the seriously ill. *Intensive Care Med.* 1992;18:210-217
- S19. Cavalcanti M, Ferrer M, Ferrer R, Morforte R, Garnacho A, Torres A: Risk and prognostic factors of ventilator-associated pneumonia in trauma patients. *Crit Care Med.* 2006;34:1067-1072
- S20. Cendrero JA, Solé-Violán J, Benitez AB, Catalán JN, Fernández JA, Santana PS, de Castro FR: Role of different routes of tracheal colonization in the development of pneumonia in patients receiving mechanical ventilation. *Chest.* 1999;116:462-470
- S21. Chaari A, El Habib M, Ghdhoun H, Algia NB, Chtara K, Hamida CB, Chelly H, Bahloul M, Bouaziz M. Does low-dose hydrocortisone therapy prevent ventilator-associated pneumonia in trauma patients?. *Am J Therap.* 2015;22(1):22-8.
- S22. Chastre J, Trouillet JL, Vuagnat A, Joly-Guillou ML, Clavier H, Dombret MC, Gibert C: Nosocomial pneumonia in patients with acute respiratory distress syndrome. *Am J Respir Crit Care Med.* 1998;157:1165-1172
- S23. Chevret S, Hemmer M, Carlet J: Incidence and risk factors of pneumonia acquired in intensive care units. Results from a multicenter prospective study on 996 patients. European Cooperative Group on Nosocomial Pneumonia. *Intensive Care Med.* 1993;19:256-264
- S24. Cook A, Norwood S, Berne J: Ventilator-associated pneumonia is more common and of less consequence in trauma patients compared with other critically ill patients. *J Trauma Acute Care Surg.* 2010;69(5):1083-91.
- S25. Craven DE, Kunches LM, Lichtenberg DA, Kollisch NR, Barry MA, Heeren TC, McCabe WR: Nosocomial infection and fatality in medical and surgical intensive care unit patients. *Arch Intern Med.* 1988;148:1161-1168
- S26. Daschner F, Kappstein I, Schuster F, Scholz R, Bauer E, Jooßens D, Just H: Influence of disposable ('Conchapak') and reusable humidifying systems on the incidence of ventilation pneumonia. *J Hosp Infect.* 1988;11:161-168
- S27. De Latorre FJ, Pont T, Ferrer A, Rosselló J, Palomar M, Planas M: Pattern of tracheal colonization during mechanical ventilation. *Am J Respir Crit Care Med.* 1995;152:1028-1033
- S28. El-Masri MM, Hammad TA, McLeskey SW, Joshi M, Korniewicz DM. Predictors of nosocomial bloodstream infections among critically ill adult trauma patients. *Infect Cont & Hosp Epidemiol.* 2004;25(8):656-63.
- S29. Ensminger SA, Wright RS, Baddour LM, Afess B: Suspected ventilator-associated pneumonia in cardiac patients admitted to the coronary care unit. *Mayo Clin Proc.* 2006;81:32-35
- S30. Esteve F, Pujol M, Limon E, Saballs M, Argerich MJ, Verdaguer R, Manez R, Ariza X, Gudiol F. Bloodstream infection related to catheter connections: a prospective trial of two connection systems. *J Hosp Infect.* 2007;67(1):30-4.
- S31. Evans HL, Zonies DH, Warner KJ, Bulger EM, Sharar SR, Maier RV, Cuschieri J. Timing of intubation and ventilator-associated pneumonia following injury. *Arch Surg.* 2010;145(11):1041-6.
- S32. Ewig S, Torres A, El-Ebiary M, Fàbregas N, Hernandez C, Gonzalez J, Nicolas JM, Soto L: Bacterial colonization patterns in mechanically ventilated patients with traumatic and medical head injury. Incidence, risk factors, and association with ventilator-associated pneumonia. *Am J Respir Crit Care Med.* 1999;159:188-198
- S33. Fabian TC, Boucher BA, Croce MA, Kuhl DA, Janning SW, Coffey BC, Kudsk KA: Pneumonia and stress ulceration in severely injured patients: a prospective evaluation of the effects of stress ulcer prophylaxis. *Arch Surg.* 1993;128(2):185-92.
- S34. Fagon JY, Chastre J, Domart Y, Trouillet JL, Pierre J, Darne C, Gibert C: Nosocomial pneumonia in patients receiving continuous mechanical ventilation. Prospective analysis of 52 episodes

with use of a protected specimen brush and quantitative culture techniques. *Am Rev Respir Dis* 1989;139:877-884.

- S35. Gacouin A, Barbarot N, Camus C, Salomon S, Isslame S, Marque S, Lavoué S, Donnio PY, Thomas R, Le Tulzo Y. Late-onset ventilator-associated pneumonia in nontrauma intensive care unit patients. *Anesth Analg*. 2009;109(5):1584-90.
- S36. Garrouste-Orgeas M, Chevret S, Arlet G, Marie O, Rouveau M, Popoff N, Schlemmer B: Oropharyngeal or gastric colonization and nosocomial pneumonia in adult intensive care unit patients. A prospective study based on genomic DNA analysis. *Am J Respir Crit Care Med*. 1997;156(5):1647-56.
- S37. Garrouste-Orgeas M, Timsit JF, Tafflet M, Misset B, Zahar JR, Soufir L, Carlet J: Excess risk of death from intensive care unit—acquired nosocomial bloodstream infections: a reappraisal. *Clin Infect Dis* 2006, 42:1118-1126.
- S38. George DL, Falk PS, Wunderink RG, Leeper Jr KV, Meduri GU, Steere EL, Glen Mayhall C: Epidemiology of ventilator-acquired pneumonia based on protected bronchoscopic sampling. *Am J Respir Crit Care Med*. 1998;158:1839-1847
- S39. Georges H, Leroy O, Guery B, Alfandari S, Beaucaire G: Predisposing factors for nosocomial pneumonia in patients receiving mechanical ventilation and requiring tracheotomy. *Chest*. 2000;118:767-774.
- S40. Giamarellos-Bourboulis EJ, Bengmark S, Kannellakopoulou K, Kotzampassi K: Pro- and synbiotics to control inflammation and infection in patients with multiple injuries. *J Trauma* 2009;67:815-821.
- S41. Giard M, Lepape A, Allaouchiche B, Guerin C, Lehot JJ, Robert MO, Vanhems P: Early- and late-onset ventilator-associated pneumonia acquired in the intensive care unit: comparison of risk factors. *J Crit Care* 2008, 23:27-33.
- S42. Gruson D, Hilbert G, Vargas F, Valentino R, Bebear C, Allery A, Bebear C, Gbikpi-Benissan GE, Cardinaud JP: Rotation and restricted use of antibiotics in a medical intensive care unit: impact on the incidence of ventilator-associated pneumonia caused by antibiotic-resistant gram-negative bacteria. *Am J Respir Crit Care Med*. 2000, 162(3):837-43.
- S43. Gruson D, Hilbert G, Vargas F, Valentino R, Bui N, Pereyre S, Bebear C, Bebear CM, Gbikpi-Benissan G: Strategy of antibiotic rotation: long-term effect on incidence and susceptibilities of Gram-negative bacilli responsible for ventilator-associated pneumonia. *Crit Care Med*. 2003;31:1908-1914.
- S44. Guérin C, Girard R, Chemorin C, De Varax R, Fournier G: Facial mask noninvasive mechanical ventilation reduces the incidence of nosocomial pneumonia. *Intens care Med*. 1997;23(10):1024-32.
- S45. Heyland DK, Cook DJ, Schoenfeld PS, Frietag A, Varon J, Wood G: The effect of acidified enteral feeds on gastric colonization in critically ill patients: results of a multicenter randomized trial. Canadian Critical Care Trials Group. *Crit Care Med*. 1999;27:2399-2406
- S46. Holzapfel L, Chevret S, Madinier G, Ohen F, Demingon G, Coupry A, Chaudet M: Influence of long-term oro- or nasotracheal intubation on nosocomial maxillary sinusitis and pneumonia: results of a prospective, randomized, clinical trial. *Crit Care Med*. 1993;21:1132-1138
- S47. Hortal J, Giannella M, Pérez MJ, Barrio JM, Desco M, Bouza E, Muñoz P. Incidence and risk factors for ventilator-associated pneumonia after major heart surgery. *Intens care med*. 2009;35(9):1518-25.
- S48. Huang SS, Septimus E, Kleinman K, Moody J, Hickok J, Avery TR, Lankiewicz J, Gombosov A, Terpstra L, Hartford F, Hayden MK. Targeted versus universal decolonization to prevent ICU infection. *N Engl J Med*. 2013;368(24):2255-65.
- S49. Hugonnet S, Uçkay I, Pittet D Staffing level: a determinant of late-onset ventilator-associated pneumonia. *Crit Care*. 2007;11(4):R80



- S50. Hyllienmark P, Brattström O, Larsson E, Martling CR, Petersson J, Oldner A: High incidence of post- injury pneumonia in intensive care- treated trauma patients. *Acta Anaesthesiologica Scandinavica*. 2013;57(7):848-54.
- S51. Ibáñez J, Peñafiel A, Marsé P, Jordá R, Raurich JM, Mata F: Incidence of gastroesophageal reflux and aspiration in mechanically ventilated patients using small-bore nasogastric tubes. *J Parenteral and Enteral Nutrition*. 2000;24(2):103-6.
- S52. Ibrahim EH, Ward S, Sherman G, Kollef MH: A comparative analysis of patients with early-onset vs late-onset nosocomial pneumonia in the ICU setting. *Chest*. 2000;117:1434-1442
- S53. Jaillette E, Nseir S: Relationship between inhaled  $\beta_2$ -agonists and ventilator-associated pneumonia: A cohort study. *Critical Care Med*. 2011;39(4):725-30.
- S54. Jiménez P, Torres A, Rodríguez-Roisin R, de la Bellacasa JP, Aznar R, Gatell JM, Agustí-Vidal A: Incidence and etiology of pneumonia acquired during mechanical ventilation. *Crit Care Med*. 1989;17:882-5.
- S55. Kallel H, Chelly H, Bahloul M, Ksibi H, Dammak H, Chaari A, Hamida CB, Rekik N, Bouaziz M. The effect of ventilator-associated pneumonia on the prognosis of head trauma patients. *J Trauma Acute Care Surg*. 2005;59(3):705-10.
- S56. Ko HK, Yu WK, Lien TC, Wang JH, Slutsky AS, Zhang H, Kou YR. Intensive care unit-acquired bacteremia in mechanically ventilated patients: clinical features and outcomes. *PLoS one*. 2013;8(12):e83298.
- S57. Kollef MH: Ventilator-associated pneumonia. A multivariate analysis. *JAMA*. 1993;270:1965-70.
- S58. Kollef MH, Silver P, Murphy DM, Trovillion E: The effect of late-onset ventilator-associated pneumonia in determining patient mortality. *Chest*. 1995;108: 1655-62.
- S59. Kollef MH, Von Harz B, Prentice D, Shapiro SD, Silver P, John RS, Trovillion E: Patient transport from intensive care increases the risk of developing ventilator-associated pneumonia. *Chest*. 1997;112(3):765-773.
- S60. Kollef MH, Chastre J, Fagon JY, François B, Niederman MS, Rello J, Torres A, Vincent JL, Wunderink RG, Go KW, Rehm C. Global prospective epidemiologic and surveillance study of ventilator-associated pneumonia due to *Pseudomonas aeruginosa*. *Crit care med*. 2014;42(10):2178-87.
- S61. Koss WG, Khalili TM, Lemus JF, Chelly MM, Margulies DR, Shabot MM: Nosocomial pneumonia is not prevented by protective contact isolation in the surgical intensive care unit. *Am Surg*. 2001;67:1140-4.
- S62. Kunac A, Sifri ZC, Mohr AM, Horng H, Lavery RF, Livingston DH: Bacteremia and Ventilator-Associated Pneumonia: A Marker for Contemporaneous Extra-Pulmonic Infection. *Surg Infect*. 2014;15:77-83.
- S63. Laggner AN, Lenz K, Base W, Druml W, Schneeweiss B, Grimm G: Prevention of upper gastrointestinal bleeding in long-term ventilated patients. Sucralfate versus ranitidine. *Am J Med*. 1989;86:81-4.
- S64. Lambert ML, Suetens C, Savey A, Palomar M, Hiesmayr M, Morales I, Agodi A, Frank U, Mertens K, Schumacher M, Wolkewitz M. Clinical outcomes of health-care-associated infections and antimicrobial resistance in patients admitted to European intensive-care units: a cohort study. *Lancet Infect Dis*. 2011;11(1):30-8.
- S65. Laupland KB, Zygun DA, Davies HD, Church DL, Louie TJ, Doig CJ Population-based assessment of intensive care unit-acquired bloodstream infections in adults: incidence, risk factors, and associated mortality rate. *Crit Care Med* 2002;30:2462-2467.
- S66. Laupland KB, Kirkpatrick AW, Church DL, Ross T, Gregson DB Intensive-care-unit-acquired bloodstream infections in a regional critically ill population. *J Hosp Infect* 2004;58(2): 137-145.

- S67. Lepelletier D, Roquilly A, Mahe PJ, Loutrel O, Champin P, Corvec S, Naux E, Pinaud M, Lejus C, Asehnoune K. Retrospective analysis of the risk factors and pathogens associated with early-onset ventilator-associated pneumonia in surgical-ICU head-trauma patients. *J Neurosurg Anesthesiol.* 2010;22(1):32-7.
- S68. Luyt CE, Guérin V, Combes A, Trouillet JL, Ayed SB, Bernard M, Gibert C, Chastre J: Procalcitonin kinetics as a prognostic marker of ventilator-associated pneumonia. *Am J Respir Crit Care Med.* 2005;171:48-53.
- S69. Magnason S, Kristinsson KG, Stefansson T, Erlendsdottir H, Jonsdottir K, Kristjansson M, Gudmundsson S: Risk factors and outcome in ICU- acquired infections. *Acta Anaesthesiologica Scandinavica.* 2008;52:1238-1245
- S70. Magret M, Amaya-Villar R, Garnacho J, Lisboa T, Diaz E, DeWaele J, Deja M, Manno E, Rello J, EU-VAP/CAP Study Group: Ventilator-associated pneumonia in trauma patients is associated with lower mortality: results from EU-VAP study. *J Trauma Acute Care Surg.* 2010;69(4):849-854.
- S71. Mahul P, Auboyer C, Jospe R, Ros A, Guerin C, el Khouri Z, Galliez M, Dumont A, Gaudin O: Prevention of nosocomial pneumonia in intubated patients respective role of mechanical subglottic secretions drainage and stress ulcer prophylaxis. *Intensive Care Med.* 1992;18:20-25
- S72. Makris D, Manoulakas E, Komnos A, Papakrivou E, Tzovaras N, Hovas A, Zintzaras E, Zakynthinos E. Effect of pravastatin on the frequency of ventilator-associated pneumonia and on intensive care unit mortality: open-label, randomized study. *Crit care med.* 2011;39(11):2440-6.
- S73. Markowicz P, Wolff M, Djedaini K, Cohen Y, Chastre J, Delclaux C: Multicenter prospective study of ventilator-associated pneumonia during acute respiratory distress syndrome. Incidence, prognosis, and risk factors. ARDS Study Group. *Am J Respir Crit Care Med.* 2000;161:1942-8.
- S74. Moine P, Timsit JF, De Lassece A, Troché G, Fosse JP, Alberti C, Cohen Y: Mortality associated with late-onset pneumonia in the intensive care unit: results of a multi-center cohort study. *Intensive Care Med.* 2002;28:154-163
- S75. Montecalvo MA, Steger KA, Farber HW: Nutritional outcome and pneumonia in critical care patients randomized to gastric versus jejunal tube feedings. The Critical Care Research Team. *Crit Care Med* 1992, 20:1377-1387.
- S76. Myny D, Depuydt P, Colardyn F, Blot S: Ventilator-associated pneumonia in a tertiary care ICU analysis of risk factors for acquisition and mortality. *Acta Clin Belg.* 2005;60:114-121.
- S77. Nguile-Makao M, Zahar JR, Français A, Tabah A, Garrouste-Orgeas M, Allaouchiche B, Goldgran-Toledano D, Azoulay E, Adrie C, Jamali S, Clec'h C. Attributable mortality of ventilator-associated pneumonia: respective impact of main characteristics at ICU admission and VAP onset using conditional logistic regression and multi-state models. *Intens care med.* 2010;36(5):781-9.
- S78. Nielsen SL, Røder B, Magnussen P, Engquist A, Frimodt-møller N. Nosocomial pneumonia in an intensive care unit in a Danish university hospital: incidence, mortality and etiology. *Scand J Infect Dis.* 1992;24:65-70.
- S79. Nseir S, Di Pompeo C, Soubrier S, Cavestri B, Jozefowicz E, Saulnier F, Durocher A: Impact of ventilator-associated pneumonia on outcome in patients with COPD. *Chest.* 2005;128(3):1650-1656.
- S80. Osmon S, Warren D, Seiler SM, Shannon W, Fraser VJ, Kollef MH: The influence of infection on hospital mortality for patients requiring >48 h of intensive care. *Chest* 2003, 124:1021-1029.
- S81. Papazian L, Bregeon F, Thirion X, Gregoire R, Saux P, Denis JP, Perin G, Charrel J, Dumon JF, Affray JP, Gouin F: Effect of ventilator-associated pneumonia on mortality and morbidity. *Am J Respir Crit Care Med.* 1996;154:91-7.
- S82. Potgieter PD, Linton DM, Oliver S, Forder AA: Nosocomial infections in a respiratory intensive care unit. *Crit Care Med.* 1987;15:495-498

- S83. Rello J, Quintana E, Ausina V, Castella J, Luquin M, Net A, Prats G: Incidence, etiology, and outcome of nosocomial pneumonia in mechanically ventilated patients. *Chest*. 1991;100:439-444
- S84. Rello J, Ausina V, Castella J, et al Nosocomial respiratory tract infections in multiple trauma patients. Influence of level of consciousness with implications for therapy. *Chest* 1992;102:525-529
- S85. Rello J, Ricart M, Mirelis B, Quintana E, Gurgui M, Net A, Prats, G: Nosocomial bacteremia in a medical-surgical intensive care unit: epidemiologic characteristics and factors influencing mortality in 111 episodes. *Intensive Care Med* 1994;20:94-98.
- S86. Rello J, Ausina V, Ricart M, Puzo C, Quintana E, Net A, Prats G. Risk factors for infection by *Pseudomonas aeruginosa* in patients with ventilator-associated pneumonia. *Intens Care Med*. 1994;20(3):193-8.
- S87. Rello J, Sonora R, Jubert P, et al. Pneumonia in intubated patients: role of respiratory airway *Care Am J Respir Crit Care Med* 1996;154:111-5.
- S88. Rello J, Ollendorf DA, Oster G, et al. Epidemiology and outcomes of ventilator-associated pneumonia in a large US database. *Chest* 2002;122:2115-2121
- S89. Rello J, Lorente C, Diaz E, et al. Incidence, etiology, and outcome of nosocomial pneumonia in ICU patients requiring percutaneous tracheotomy for mechanical ventilation. *Chest*. 2003;124:2239-2243.
- S90. Reusser P, Zimmerli W, Scheidegger D, Marbet GA, Buser M, Gyr K: Role of gastric colonization in nosocomial infections and endotoxemia: a prospective study in neurosurgical patients on mechanical ventilation. *J Infect Dis*. 1989;160:414-421
- S91. Rincón-Ferrari MD, Flores-Cordero JM, Leal-Noval SR, Murillo-Cabezas F, Cayuelas A, Muñoz-Sánchez MA, Sánchez-Olmedo JI: Impact of ventilator-associated pneumonia in patients with severe head injury. *J Trauma Acute Care Surg*. 2004;57(6):1234-40.
- S92. Rodriguez JL, Gibbons KJ, Bitzer LG, Dechert RE, Steinberg SM, Flint LM: Pneumonia: incidence, risk factors, and outcome in injured patients. *J Trauma*. 1991;31: 907-12.
- S93. Ruiz-Santana S, Garcia Jimenez A, Esteban A, et al. ICU pneumonias: a multi-institutional study. *Crit Care Med*. 1987;15:930-932.
- S94. Salata RA, Lederman MM, Shlaes DM, Jacobs MR, Eckstein E, Tweardy D, Toossi Z, Chmielewski R, Marino J, King CH: Diagnosis of nosocomial pneumonia in intubated, intensive care unit patients. *Am Rev Respir Dis*. 1987;135:426-432
- S95. Shahin J, Bielinski M, Guichon C, Flemming C, Kristof AS Suspected ventilator-associated respiratory infection in severely ill patients: a prospective observational study. *Crit Care* 2013;17(5): R251
- S96. Sligl W, Taylor G, Brindley PG. Five years of nosocomial Gram-negative bacteremia in a general intensive care unit: epidemiology, antimicrobial susceptibility patterns, and outcomes. *Int J Infect Dis*. 2006;10(4):320-5.
- S97. Sofianou DC, Constandinidis TC, Yannacou M, Anastasiou H, Sofianos E: Analysis of risk factors for ventilator-associated pneumonia in a multidisciplinary intensive care unit. *Eur J Clin Microbiol Infect Dis* 2000, 19:460-463.
- S98. Stéphan F, Mabrouk N, Decailliot F, Delclaux C, Legrand P: Ventilator-associated pneumonia leading to acute lung injury after trauma: importance of *Haemophilus influenzae*. *Anesthesiology*. 2006;104: 235-41.
- S99. Tejada Artigas AT, Dronda SB, Vallés EC, Marco JM, Usón MC, Figueras P, Suarez FJ, Hernandez A: Risk factors for nosocomial pneumonia in critically ill trauma patients. *Crit Care Med*. 2001;29:304-9.
- S100. Thompson DS. Estimates of the rate of acquisition of bacteraemia and associated excess mortality in a general intensive care unit: a 10 year study. *J Hosp Infect*. 2008;69(1):56-61.

- S101. Timsit JF, Chevret S, Valcke J, Misset B, Renaud B, Goldstein FW, Vaury P, Carlet J: Mortality of nosocomial pneumonia in ventilated patients: influence of diagnostic tools. *Am J Respir Crit Care Med.* 1996;154:116-23.
- S102. Torres A, Aznar R, Gatell JM, Jiménez P, González J, Ferrer A, Celis R, Rodriguez-Roisin R: Incidence, risk, and prognosis factors of nosocomial pneumonia in mechanically ventilated patients. *Am Rev Respir Dis.* 1990;142:523-8.
- S103. Trouillet JL, Chastre J, Vuagnat A, Joly-Guillou ML, Combaux D, Dombret MC, Gibert C: Ventilator-associated pneumonia caused by potentially drug-resistant bacteria. *Am J Respir Crit Care Med.* 1998;157(2):531-9.
- S104. Urli T, Perone G, Acquarolo A, Zappa S, Antonini B, Ciani A: Surveillance of infections acquired in intensive care: usefulness in clinical practice. *J Hosp Infect* 2002, 52:130-5.
- S105. Valles J, Pobo A, Garcia-Esquirol O, Mariscal D, Real J, Fernández R. Excess ICU mortality attributable to ventilator-associated pneumonia: the role of early vs late onset. *Intensive care medicine,* 2007;33(8):1363-1368.
- S106. Vanhems P, Bénet T, Voirin N, Januel JM, Lepape A, Allaouchiche B, Argaud L, Chassard D, Guérin C. Early-onset ventilator-associated pneumonia incidence in intensive care units: a surveillance-based study. *BMC Infect Dis.* 2011;11(1):236.
- S107. Verhamme KM, De Coster W, De Roo L, De Beenhouwer H, Nollet G, Verbeke J, Demeyer I, Jordens P: Pathogens in early-onset and late-onset intensive care unit-acquired pneumonia. *Infection Control Hospital Epidemiol.* 2007;28(4):389-397.
- S108. Violan JS, Sanchez-Ramirez C, Mujica AP, Cendrero JC, Fernandez JA, de Castro FR: Impact of nosocomial pneumonia on the outcome of mechanically-ventilated patients. *Crit Care (Lond).* 1998;2:19-23.
- S109. Warren DK, Zack JE, Elward AM, Cox MJ, Fraser VJ. Nosocomial primary bloodstream infections in intensive care unit patients in a nonteaching community medical center: a 21-month prospective study. *Clin Infect Dis.* 2001;33(8):1329-35.
- S110. Woske HJ, Rödging T, Schulz I, Lode H: Ventilator-associated pneumonia in a surgical intensive care unit Epidemiology, etiology and comparison of three bronchoscopic methods for microbiological specimen sampling. *Crit Care.* 2001;5:167-173.
- S111. Zahar JR, Nguile-Makao M, Français A, Schwebel C, Garrouste-Orgeas M, Goldgran-Toledano D, Azoulay E, Thuong M, Jamali S, Cohen Y, De Lassence A. Predicting the risk of documented ventilator-associated pneumonia for benchmarking: construction and validation of a score. *Crit care med.* 2009;37(9):2545-51.
- S112. Acosta-Escribano J, Fernández-Vivas M, Carmona TG, Caturla-Such J, Garcia-Martinez M, Menendez-Mainer A, Sanchez-Payá J (2010) Gastric versus transpyloric feeding in severe traumatic brain injury: a prospective, randomized trial. *Intensive Care Med* 36:1532-1539
- S113. Bonten MJ, Gaillard CA, Van der Geest S, Van Tiel FH, Beysens AJ, Smeets HG, Stobberingh EE: The role of intragastric acidity and stress ulcer prophylaxis on colonization and infection in mechanically ventilated ICU patients. A stratified, randomized, double-blind study of sucralfate versus antacids. *Am J Respir Crit Care Med.* 1995;152:1825-1834.
- S114. Combes P, Fauvage B, Oleyer C. Nosocomial pneumonia in mechanically ventilated patients, a prospective randomised evaluation of the Stericath closed suctioning system. *Intensive Care Med* 2000;26:878-82.
- S115. Cook D, Guyatt G, Marshall J, et al A comparison of sucralfate and ranitidine for the prevention of upper gastrointestinal bleeding in patients requiring mechanical ventilation. Canadian Critical Care Trials Group. *N Engl J Med* 1998;338:791-797

- S116. Dreyfuss D, Djedaini K, Weber P, Brun P, Lanore JJ, Rahmani J, Coste F: Prospective study of nosocomial pneumonia and of patient and circuit colonization during mechanical ventilation with circuit changes every 48 hours versus no change. *Am Rev Respir Dis.* 1991;143(4 Pt 1), 738-743.
- S117. Daumal F, Colpart E, Manoury B, Mariani M, Daumal M. Changing heat and moisture exchangers every 48 hours does not increase the incidence of nosocomial pneumonia. *Infection Control & Hospital Epidemiology.* 1999;20(5):347-9.
- S118. Drakulovic MB, Torres A, Bauer TT, Nicolas JM, Nogué S, Ferrer M: Supine body position as a risk factor for nosocomial pneumonia in mechanically ventilated patients: a randomised trial. *Lancet.* 1999;354(9193):1851-1858
- S119. Dreyfuss D, Djedaïni K, Gros I, Mier L, Le Bourdellés G, Cohen Y, Estagnasié P, Coste F, Boussougant Y: Mechanical ventilation with heated humidifiers or heat and moisture exchangers: effects on patient colonization and incidence of nosocomial pneumonia. *Am J Respir Crit Care Med.* 1995;151:986-92.
- S120. Driks MR, Craven DE, Celli BR, et al (1987) Nosocomial pneumonia in intubated patients given sucralfate as compared with antacids or histamine type 2 blockers. The role of gastric colonization. *N Engl J Med* 317:1376-1382
- S121. Forestier C, Guelon D, Cluytens V, Guillart T, Sirot J, De champs C: Oral probiotic and prevention of *Pseudomonas aeruginosa* infections: a randomized, double-blind, placebo controlled pilot study in intensive care unit patients. *Crit Care* 2008;12:R69.
- S122. Heyland DK, Cook DJ, Schoenfeld PS, Frietag A, Varon J, Wood G The effect of acidified enteral feeds on gastric colonization in critically ill patients: results of a multicenter randomized trial. Canadian Critical Care Trials Group. *Crit Care Med* 1999;27:2399-2406
- S123. Holzapfel L, Chastang C, Demingeon G, Bohe J, Piralla B, Coupry A: A randomized study assessing the systematic search for maxillary sinusitis in nasotracheally mechanically ventilated patients. Influence of nosocomial maxillary sinusitis on the occurrence of ventilator-associated pneumonia. *Am J Respir Crit Care Med.* 1999;159:695-701
- S124. Kirschenbaum L, Azzi E, Sfeir T, et al. Effect of continuous lateral rotational therapy on the prevalence of ventilator-associated pneumonia in patients requiring long-term ventilatory care *Crit Care Med* 2002;30:1983-6.
- S125. Kirton OC, DeHaven B, Morgan J, et al. A prospective, randomized comparison of an in-line heat moisture exchange filter and heated wire humidifiers: rates of ventilator-associated early-onset (community-acquired) or late-onset (hospital-acquired) pneumonia and incidence of endotracheal tube occlusion. *Chest* 1997;112:1055-9.
- S126. Knight DJ, Gardiner D, Banks A, Snape SE, Weston VC, Bengmark S, Girling KJ: Effect of synbiotic therapy on the incidence of ventilator associated pneumonia in critically ill patients: a randomised, double-blind, placebo-controlled trial. *Intensive Care Med.* 2009;35:854-861.
- S127. Kollef MH, Vlasnik J, Sharpless L, Pasque C, Murphy D, Fraser V (1997) Scheduled change of antibiotic classes: A strategy to decrease the incidence of ventilator-associated pneumonia. *Am J Respir Crit Care Med* 156:1040–1048
- S128. Kollef MH, Afessa B, Anzueto A, Veremakis C, Kerr KM, Margolis BD, Schinner R: Silver-coated endotracheal tubes and incidence of ventilator-associated pneumonia: the NASCENT randomized trial. *JAMA.* 2008;300(7):805-813
- S129. Kortbeek JB, Haigh PI, Doig C. Duodenal versus gastric feeding in ventilated blunt trauma patients: a randomized controlled trial. *J Trauma* 1999;46:992-6.
- S130. Lacherade JC, Auburtin M, Cerf C, Van de Louw A, Soufir L, Rebufat Y, Rezaiguia S, Ricard JD, Lellouche F, Brun-Buisson C, Brochard L: Impact of humidification systems on ventilator-associated pneumonia: a randomized multicenter trial. *Am J Respir Crit Care Med.* 2005;172:1276-1282

- S131. Lacherade JC, De Jonghe B, Guezennec P, Debbat K, Hayon J, Monsel A, Bastuji-Garin S: Intermittent subglottic secretion drainage and ventilator-associated pneumonia A multicenter trial. *Am J Respir Crit Care Med.* 2010;182:910-917.
- S132. Launey Y, Nessler N, Le Cousin A, Feuillet F, Garlantezec R, Mallédant Y, Seguin P: Effect of a fever control protocol-based strategy on ventilator-associated pneumonia in severely brain-injured patients. *Crit Care.* 2014;18(6):1.
- S133. Lorente L, Lecuona M, Málaga J, Revert C, Mora ML, Sierra A: Bacterial filters in respiratory circuits: an unnecessary cost? *Crit Care Med* 2003;31:2126-2130
- S134. Lorente L, Lecuona M, Galván R, Ramos MJ, Mora ML, Sierra A: Periodically changing ventilator circuits is not necessary to prevent ventilator-associated pneumonia when a heat and moisture exchanger is used. *Infect Control Hosp Epidemiol.* 2004;25:1077-1082
- S135. Lorente L, Lecuona M, Martín MM, García C, Mora ML, Sierra A: Ventilator-associated pneumonia using a closed versus an open tracheal suction system. *Crit Care Med.* 2005;33:115-119
- S136. Lorente L, Lecuona M, Jiménez A, Mora ML, Sierra A: Tracheal suction by closed system without daily change versus open system. *Intensive Care Med.* 2006;32:538-44.
- S137. Lorente L, Lecuona M, Jimenez A, Mora ML, Sierra A: Ventilator-associated pneumonia using a heated humidifier or a heat and moisture exchanger: a randomized controlled trial [ISRCTN88724583]. *Crit Care* 2006;10:R116
- S138. Lorente L, Lecuona M, Jimenez A, Mora ML, Sierra: Influence of an endotracheal tube with polyurethane cuff and subglottic secretion drainage on pneumonia. *Am J Respir Crit Care Med.* 2007;176:1079-1083
- S139. Lorente L, Lecuona M, Jiménez A, Lorenzo L, Roca I, Cabrera J, Llanos C, Mora ML: Continuous endotracheal tube cuff pressure control system protects against ventilator-associated pneumonia. *Crit Care.* 2014;18(2):1.
- S140. Manzano F, Fernandez-Mondejar E, Colmenero M, Poyatos ME, Rivera R, Machado J, Catalan I, Artigas A: Positive-end expiratory pressure reduces incidence of ventilator-associated pneumonia in nonhypoxemic patients. *Crit Care Med:* 2008;36(8):2225-31.
- S141. Martin C, Perrin G, Gevaudan MJ, Saux P, Gouin F. Heat and moisture exchangers and vaporizing humidifiers in the intensive care unit. *Chest.* 1990;97(1):144-9.
- S142. Morrow LE, Kollef MH, Casale TB: Probiotic prophylaxis of ventilator-associated pneumonia: a blinded, randomized, controlled trial. *Am J Respir Crit Care Med.* 2010;182:1058-1064
- S143. Nseir S, Zerimech F, Fournier C, Lubret R, Ramon P, Durocher A, Balduyck M: Continuous control of tracheal cuff pressure and microaspiration of gastric contents in critically ill patients. *Am J Respir Crit Care Med.* 2011;184(9):1041-7.
- S144. Pickworth KK, Falcone RE, Hoogeboom JE, et al Occurrence of nosocomial pneumonia in mechanically ventilated trauma patients: a comparison of sucralfate and ranitidine. *Crit Care Med* 1993;21:1856-1862
- S145. Pneumatikos I, Konstantonis D, Tsagaris I, Theodorou V, Vretzakis G, Danielides V, Bouros D: Prevention of nosocomial maxillary sinusitis in the ICU: the effects of topically applied alpha-adrenergic agonists and corticosteroids. *Intensive Care Med.* 2006;32:532-537
- S146. Prod'homme G, Leuenberger P, Koerfer J, Blum A, Chiolerio R, Schaller MD, Perret C, Spinnler O, Blondel J, Siegrist H, Saghafi L: Nosocomial pneumonia in mechanically ventilated patients receiving antacid, ranitidine, or sucralfate as prophylaxis for stress ulcer. A randomized controlled trial. *Ann Intern Med.* 1994;120:653-62.
- S147. Reignier J, Mercier E, Le Gouge A, Boulain T, Desachy A, Bellec F, Lascarrou JB: Effect of Not Monitoring Residual Gastric Volume on Risk of Ventilator-Associated Pneumonia in Adults Receiving

Mechanical Ventilation and Early Enteral Feeding. A Randomized Controlled Trial. *JAMA* 2013, 309;249-256.

- S148. Ryan P, Dawson J, Teres D, Celoria G, Navab F: Nosocomial pneumonia during stress ulcer prophylaxis with cimetidine and sucralfate. *Arch Surg.* 1993;128(12):1353-7.
- S149. Smulders K, van der Hoeven H, Weers-Pothoff I, Vandenbroucke-Grauls C A randomized clinical trial of intermittent subglottic secretion drainage in patients receiving mechanical ventilation. *Chest* 2002;121:858-862
- S150. Staudinger T, Bojic A, Holzinger U, Meyer B, Rohwer M, Mallner F, Locker GJ Continuous lateral rotation therapy to prevent ventilator-associated pneumonia *Crit Care Med* 2010;38(2):486-490
- S151. Thomachot L, Viviani X, Arnaud S, Boisson C, Martin CD: Comparing two heat and moisture exchangers, one hydrophobic and one hygroscopic, on humidifying efficacy and the rate of nosocomial pneumonia. *Chest.* 1998;114:1383-1389
- S152. Thomachot L, Leone M, Razzouk K, Antonini F, Vialet R, Martin C: Do the components of heat and moisture exchanger filters affect humidifying efficacy and the incidence of nosocomial pneumonia? *Crit Care Med.* 1999;27:923-928
- S153. Thomachot L, Leone M, Razzouk K, Antonini F, Vialet R, Martin C: Randomized Clinical Trial of Extended Use of a Hydrophobic Condenser Humidifier: 1 vs 7 Days. *Crit Care Med.* 2002;30:232-7
- S154. Valencia M, Ferrer M, Farre R, Navajas D, Badia JR, Nicolas JM, Torres A: Automatic control of tracheal tube cuff pressure in ventilated patients in semirecumbent position: a randomized trial. *Crit Care Med.* 2007;35: 1543-9.
- S155. Valles J, Artigas A, Rello J, et al. Continuous aspiration of subglottic secretions in preventing ventilator-associated pneumonia. *Ann Intern Med* 1995;122:179-86.
- S156. Walaszek M, Gniadek A, Kolpa M, Wolak Z, Kosiarska A. The effect of subglottic secretion drainage on the incidence of ventilator associated pneumonia. *Biomed Pap Med Fac Univ Palacky Olomouc Czech Repub.* 2017;161(4):374-80.
- S157. Čabov T, Macan D, Husedžinović I, Škrilin-Šubić J, Bošnjak D, Šestan-Crnec S, Perić B, Kovač Z, Golubović V. The impact of oral health and 0.2% chlorhexidine oral gel on the prevalence of nosocomial infections in surgical intensive-care patients: a randomized placebo-controlled study. Einfluss von Mundgesundheit und von 0, 2% Chlorhexidin-Gel auf die Entwicklung von nosokomialen Infektionen bei Patienten auf einer chirurgischen Intensivstation. *Wiener klinische Wochenschrift.* 2010;122(13-14):397-404.
- S158. Climo MW, Yokoe DS, Warren DK et al. Effect of daily chlorhexidine bathing on hospital-acquired infection. *N Engl J Med* 2013; 368: 533-542.
- S159. Fourrier FE, Cau-Pottier H, Boutigny M, Roussel-Delvallez M, Jourdain, Chopin C: Effects of dental plaque antiseptic decontamination on bacterial colonization and nosocomial infections in critically ill patients. *Intensive Care Med.* 2000;26:1239-1247
- S160. Fourrier F, Dubois D, Pronnier P, Herbecq P, Leroy O, Desmettre T, Roussel-Delvallez M: Effect of gingival and dental plaque antiseptic decontamination on nosocomial infections acquired in the intensive care unit a double-blind placebo-controlled multicenter study. *Crit Care Med.* 2005;33:1728-1735
- S161. Koeman M, van der Ven AJ, Hak E, et al. Oral decontamination with chlorhexidine reduces the incidence of ventilator-associated pneumonia. *Am J Respir Crit Care Med* 2006;173:1348-1355
- S162. Kollef M, Pittet D, Sanchez Garcia M, et al. A randomized double-blind trial of isegagan in prevention of ventilator-associated pneumonia. *Am J Respir Crit Care Med* 2006: 173:91-7.
- S163. Lorente L, Lecuona M, Jiménez A, Palmero S, Pastor E, Lafuente N, Ramos MJ, Mora ML, Sierra A: Ventilator-associated pneumonia with or without toothbrushing a randomized controlled trial. *Eur J Clin Microbiol Infect Dis.* 2012;31:1-9

- S164. Noto MJ, Domenico HJ, Byrne DW, Talbot T, Rice TW, Bernard GR, Wheeler AP. Chlorhexidine bathing and health care-associated infections: a randomized clinical trial. *JAMA*. 2015;313(4):369-78.
- S165. Seguin P, Tanguy M, Laviolle B, Tirel O, Malledant Y: Effect of oropharyngeal decontamination by povidone-iodine on ventilator-associated pneumonia in patients with head trauma. *Crit Care Med* 2006, 34:1514-1519.
- S166. Seguin P, Laviolle B, Dahyot-Fizelier C, Dumont R, Veber B, Gergaud S, Asehnoune K, Mimoz O, Donnio PY, Bellissant E, Malledant Y. Effect of oropharyngeal povidone-iodine preventive oral care on ventilator-associated pneumonia in severely brain-injured or cerebral hemorrhage patients: a multicenter, randomized controlled trial. *Crit care med*. 2014;42(1):1-8.
- S167. Swan JT, Ashton CM, Bui LN, Pham VP, Shirkey BA, Blackshear JE, Bersamin JB, Pomer RM, Johnson ML, Magtoto AD, Butler MO. Effect of chlorhexidine bathing every other day on prevention of hospital-acquired infections in the surgical ICU: a single-center, randomized controlled trial. *Crit Care Med*. 2016;44(10):1822-32.
- S168. Wittekamp BH, Plantinga NL, Cooper BS, Lopez-Contreras J, Coll P, Mancebo J, Wise MP, Morgan MP, Depuydt P, Boelens J, Dugernier T. Decontamination strategies and bloodstream infections with antibiotic-resistant microorganisms in ventilated patients: a randomized clinical trial. *JAMA*. 2018.
- S169. Bergmans DC, Bonten MJ, Gaillard CA, et al Prevention of ventilator-associated pneumonia by oral decontamination: a prospective, randomized, double-blind, placebo-controlled study. *Am J Respir Crit Care Med* 2001;164:382-388
- S170. Bonten MJ, Gaillard CA, Johanson Jr WG, Van Tiel FH, Smeets HG, Van Der Geest S, Stobberingh EE. Colonization in patients receiving and not receiving topical antimicrobial prophylaxis. *Am J Respir Crit Care Med* 1994;150(5):1332-1340.
- S171. Camus C, Salomon S, Bouchigny C, Gacouin A, Lavoué S, Donnio PY, Javaudin L, Chapplain JM, Uhel F, Le Tulzo Y, Bellissant E. Short-term decline in all-cause acquired infections with the routine use of a decontamination regimen combining topical polymyxin, tobramycin, and amphotericin B with mupirocin and chlorhexidine in the ICU: a single-center experience. *Crit Care Med*. 2014;42(5):1121-30.
- S172. de Smet AMGA, Kluytmans JAJW, Cooper BS, Mascini EM, Benus RFJ, van der Werf TS, van der Hoeven JG, Pickkers P, Bogaers-Hofman D, van der Meer NJ, Bernards AT, Kuijper EJ, Joore JC, Leverstein-van Hall MA, Bindels AJ, Jansz AR, Wesselink RM, de Jongh BM, Dennesen PJ, van Asselt GJ, te Velde LF, Frenay IH, Kaasjager K, Bosch FH, van Iterson M, Thijsen SF, Kluge GH, Pauw W, de Vries JW, Kaan JA, Arends JP, Aarts LP, Sturm PD, Harinck HI, Voss A, Uijtendaal EV, Blok HE, Thieme Groen ES, Pouw ME, Kalkman CJ, Bonten MJ: Decontamination of the digestive tract and oropharynx in ICU patients. *N Engl J Med* 2009, 360:20–31.
- S173. Godard J, Guillaume C, Reverdy ME, Bachmann P, Bui-Xuan B, Nageotte A, Motin J: Intestinal decontamination in a polyvalent ICU. A double-blind study. *Intensive Care Med* 1990, 16:307-311.
- S174. Hartenauer U, Thulig B, Diemer W, Lawin P, Fegeler W, Kehrel R, Ritzerfeld W Effect of selective flora suppression on colonization, infection, and mortality in critically ill patients: a one-year, prospective consecutive study. *Crit Care Med* 1991;19:463-473
- S175. Oostdijk EA, de Smet AM, Kesecioglu J, Bonten MJ. The role of intestinal colonization with gram-negative bacteria as a source for intensive care unit-acquired bacteremia. *Crit Care. Med*. 2011;39(5):961-6.
- S176. Stoutenbeek CP, Van Saene HK, Miranda DR, Zandstra DF. The effect of selective decontamination of the digestive tract on colonisation and infection rate in multiple trauma patients. *Intens Care Med*. 1984;10(4):185-92.



- S177. Stoutenbeek CP, van Saene HK, Miranda DR, Zandstra DF, Langrehr D; The effect of oropharyngeal decontamination using topical nonabsorbable antibiotics on the incidence of nosocomial respiratory tract infections in multiple trauma patients. *J Trauma* 1987;27:357-364
- S178. Winter R, Humphreys H, Pick A, MacGowan AP, Willatts SM, Speller DC: A controlled trial of selective decontamination of the digestive tract in intensive care and its effect on nosocomial infection. *J Antimicrob Chemother.* 1992;30:73-87
- S179. Abele-Horn M, Dauber A, Bauernfeind A, Russwurm W, Seyfarth-Metzger I, Gleich P, Ruckdeschel G: Decrease in nosocomial pneumonia in ventilated patients by selective oropharyngeal decontamination (SOD). *Intensive Care Med.* 1997;23:187-95.
- S180. Acquarolo A, Urli T, Perone G, Giannotti C, Candiani A, Latronico N. Antibiotic prophylaxis of early onset pneumonia in critically ill comatose patients. A randomized study. *Intensive Care Med.* 2005; 31(4):510-6.
- S181. Aerdt SJ, van Dalen R, Clasener HA, Festen J, van Lier HJ, Vollaard EJ: Antibiotic prophylaxis of respiratory tract infection in mechanically ventilated patients. A prospective, blinded, randomized trial of the effect of a novel regimen. *Chest.* 1991;100:783-791
- S182. Bion JF, Badger I, Crosby HA, Hutchings P, Kong KL, Baker J, Hutton P, McMaster P, Buckels JA, Elliott TSJ: Selective decontamination of the digestive tract reduces gram-negative pulmonary colonization but not systemic endotoxemia in patients undergoing elective liver transplantation. *Crit Care Med.* 1994;22:40-49
- S183. Blair P, Rowlands BJ, Lowry K, Webb H, Armstrong P, Smilie J Selective decontamination of the digestive tract: a stratified, randomized, prospective study in a mixed intensive care unit. *Surgery* 1991;110:303-309
- S184. Cockerill FR, 3rd, Muller SR, Anhalt JP, et al. Prevention of infection in critically ill patients by selective decontamination of the digestive tract. *Ann Intern Med* 1992;117:545-53.
- S185. de La Cal MA, Cerdá E, Garcia-Hierro P, Van Saene HK, Gómez-Santos D, Negro E & Lorente JA. Survival benefit in critically ill burned patients receiving selective decontamination of the digestive tract: a randomized, placebocontrolled, double-blind trial. *Ann Surg.* 2005;241:424-30.
- S186. Ferrer M, Torres A, Gonzalez J, Puig de la Bellacasa J, el-Ebiary M, Roca M, Gatell JM, Rodriguez-Roisin R: Utility of selective digestive decontamination in mechanically ventilated patients. *Ann Intern Med.* 1994;120:389-395
- S187. Georges B, Mazerolles M, Decun J-F, Rouge P, Pomies S, Cougot P Décontamination digestive sélective résultats d'une étude chez le polytraumatisé. *Réanimation Soins Intensifs Médecin d'Urgence* 1994;3:621-627
- S188. Hammond JM, Potgieter PD. Neurologic disease requiring long-term ventilation: the role of selective decontamination of the digestive tract in preventing nosocomial infection. *Chest.* 1993; 104(2):547-51.
- S189. Hammond JM, Potgieter PD, Saunders LG. Selective decontamination of the digestive tract in multiple trauma patients-Is there a role? Results of a prospective, double-blind, randomized trial. *Crit Care Med.* 1994;22(1):33-9.
- S190. Jacobs S, Foweraker JE, Roberts SE: Effectiveness of selective decontamination of the digestive tract (SDD) in an ICU with a policy encouraging a low gastric pH. *Clin Intensive Med.* 1992;3:52-58
- S191. Karvouniaris M, Makris D, Zygoulis P, Triantaris A, Xitsas S, Mantzarlis K, Petinaki E, Zakyntinos E. Nebulised colistin for ventilator-associated pneumonia prevention. *Eur Resp J.* 2015;46:1544-1547.
- S192. Korinek AM, Laisne MJ, Nicolas MH, Raskine L, Deroin V, Sanson-lepors MJ: Selective decontamination of the digestive tract in neurosurgical intensive care unit patients: a double-blind, randomized, placebo-controlled study. *Crit Care Med.* 1993;21:1466-73.

- S193. Laggner AN, Tryba M, Georgopoulos A, Lenz K, Grimm G, Graninger W, Schneeweiss B, Druml W: Oropharyngeal decontamination with gentamicin for long-term ventilated patients on stress ulcer prophylaxis with sucralfate? *Wien Klin Wochenschr* 1994, 106:15-19.
- S194. Palomar M, Alvarez-Lerma F, Jorda R, Bermejo B, Catalan Study Group of Nosocomial Pneumonia Prevention: Prevention of nosocomial infection in mechanically ventilated patients: selective digestive decontamination versus sucralfate. *Clin Intens Care*. 1997;8:228-235
- S195. Pneumatikos I, Koulouras V, Nathanail C, Goe D, Nakos G: Selective decontamination of subglottic area in mechanically ventilated patients with multiple trauma. *Intensive Care Med*. 2002;28:432-437
- S196. Quinio B, Albanese J, Bues-Charbit M, Vivian X, Martin C; Selective decontamination of the digestive tract in multiple trauma patients. A prospective double-blind, randomized, placebo-controlled study. *Chest* 1996;109:765-772
- S197. Rocha LA, Martin MJ, Pita S, Paz J, Seco C, Margusino L, Villanueva R, Duran MT: Prevention of nosocomial infection in critically ill patients by selective decontamination of the digestive tract. A randomized, double blind, placebo-controlled study. *Intensive Care Med*. 1992;18:398-404
- S198. Rodríguez-Roldán JM, Altuna-Cuesta A, López A, Carrillo A, Garcia J, León J, Martínez-Pellús AJ: Prevention of nosocomial lung infection in ventilated patients: use of an antimicrobial pharyngeal nonabsorbable paste. *Crit Care Med*. 1990;18:1239-42
- S199. Rolando N, Gimson A, Wade J, Philpott- Howard J, Casewell M, Williams R: Prospective controlled trial of selective parenteral and enteral antimicrobial regimen in fulminant liver failure. *Hepatol*. 1993;17:196-201
- S200. Rolando N, Wade JJ, Stangou A, Gimson AE, Wendon J, Philpott- Howard J, Williams R. Prospective study comparing the efficacy of prophylactic parenteral antimicrobials, with or without enteral decontamination, in patients with acute liver failure. *Liver transplantation and surgery*. 1996; 2:8-13
- S201. Sirvent JM, Torres A, El-Ebiary M, Castro P, de Batlle J, Bonet A. Protective effect of intravenously administered cefuroxime against nosocomial pneumonia in patients with structural coma. *Am J Respir Crit Care Med* 1997;155:1729-1734
- S202. Smith SD, Jackson RJ, Hannakan CJ, Wadowsky RM, Tzakis AG, Rowe MI; Selective decontamination in pediatric liver transplants. *Transplantation* 1993;55:1306-1308
- S203. Stoutenbeek CP, van Saene HKF, Little RA, Whitehead A: The effect of selective decontamination of the digestive tract on mortality in multiple trauma patients: a multicenter randomized controlled trial. *Intensive Care Med*. 2007;33:261-270
- S204. Unertl K, Ruckdeschel G, Selbmann HK, et al; Prevention of colonization and respiratory infections in long-term ventilated patients by local antimicrobial prophylaxis. *Intensive Care Med* 1987;13:106-113
- S205. Verwaest C, Verhaegen J, Ferdinande P, Schetz M, Van den Berghe G, Verbist L, Lauwers P: Randomized, controlled trial of selective digestive decontamination in 600 mechanically ventilated patients in a multidisciplinary intensive care unit. *Crit Care Med*. 1997;25:63-71
- S206. Wiener J, Itokazu G, Nathan C, Kabins SA, Weinstein RA: A randomized, double-blind, placebo-controlled trial of selective digestive decontamination in a medical-surgical intensive care unit. *Clin Infect Dis*. 1995;20:861-867
- S207. Frencken JF, Wittekamp BH, Plantinga NL, Spitoni C, van de Groep K, Cremer OL, Bonten MJ. Associations Between Enteral Colonization With Gram-Negative Bacteria and Intensive Care Unit–Acquired Infections and Colonization of the Respiratory Tract. *Clin Infect Dis*. 2017;66(4):497-503.
- S208. Garbino J, Lew DP, Romand JA, Hugonnet S, Auckenthaler R, Pittet D: Prevention of severe *Candida* infections in nonneutropenic, high-risk, critically ill patients: a randomized, double-blind,

placebo-controlled trial in patients treated by selective digestive decontamination. *Intensive Care Med* 2002;28:1708-1717

- S209. Leone M, Bourgoin A, Giuly E, et al. Influence on outcome of ventilator-associated pneumonia in multiple trauma patients with head trauma treated with selected digestive decontamination. *Crit Care Med* 2002; 30:1741-6.
- S210. Nardi G, Di Silvestre A, De Monte A, Massarutti D, Proietti A, Troncon MG, Zussino M: Reduction in gram-positive pneumonia and antibiotic consumption following the use of a SDD protocol including nasal and oral mupirocin. *Eur J Emerg Med* 2001;8:203-214
- S211. Oostdijk EAN, Kesecioglu J, Schultz MJ, et al. Notice of Retraction and Replacement: Oostdijk et al. Effects of Decontamination of the Oropharynx and Intestinal Tract on Antibiotic Resistance in ICUs: A Randomized Clinical Trial. *JAMA*. 2014;312(14):1429-1437. *JAMA* 2017
- S212. Rouby JJ, Poete P, de Lassale EM, Nicolas MH, Bodin L, Jarlier V, Korinek AM, Viars P. Prevention of Gram negative nosocomial bronchopneumonia by intratracheal colistin in critically ill patients. *Intensive Care Med*. 1994;20(3):187-92.
- S213. Silvestri L, Bragadin CM, Milanese M, Gregori D, Consales C, Gullo A, Van Saene HK. Are most ICU infections really nosocomial? A prospective observational cohort study in mechanically ventilated patients. *J Hosp Infect*. 1999;42(2):125-33.
- S214. Steffen R, Reinhartz O, Blumhardt G, Bechstein WO, Raakow R, Langrehr JM, Rossaint R, Slama K, Neuhaus P. Bacterial and fungal colonization and infections using oral selective bowel decontamination in orthotopic liver transplantations. *Transpl Inter*. 1994;7(2):101-8.
- S215. Verhaegen J: Randomized study of selective digestive decontamination on colonization and prevention of infection in mechanically ventilated patients in the ICU. 1992. Doctor in Medical Sciences – thesis, University Hospital, Leuven, Belgium.

Fig S1. (p 36) Search method, screening criteria and resulting classification of eligible studies and subsequent decant of component groups. The four numbered arrows are as follows;

- (1) An electronic search for systematic reviews or meta-analysis (SR/MA) containing potentially eligible studies using search terms; “ventilator associated pneumonia”, “mechanical ventilation”, “intensive care unit”, each combined with either “meta-analysis” or “systematic review” up to December 2018;
- (2) The systematic reviews were then searched for studies of patient populations requiring prolonged (> 24 hours) ICU admission
- (3) The studies were triaged from the systematic reviews into one of four categories; studies in which there was no intervention (observational studies), studies of various non-decontamination methods such as methods delivered either via the gastric route, the airway route or via the oral care route, studies of anti-septic methods and studies with a TAP (in any formulation) based intervention.
- (4) All studies were reviewed for potentially eligible studies and screened against inclusion and exclusion criteria. Any duplicate or ineligible studies were removed and
- (5) Studies identified outside of systematic reviews were included;
- (6) The component groups were decanted from each study being control (rectangles), intervention (ovals) and observation (diamond) groups.

Note; the total numbers do not tally as some systematic reviews provided studies in more than one category and some studies provided groups in more than one category and some studies have unequal numbers of control and interventions groups.

TAP = Topical antibiotic prophylaxis

**Figure 1: Flow chart of literature search and study and group decant**

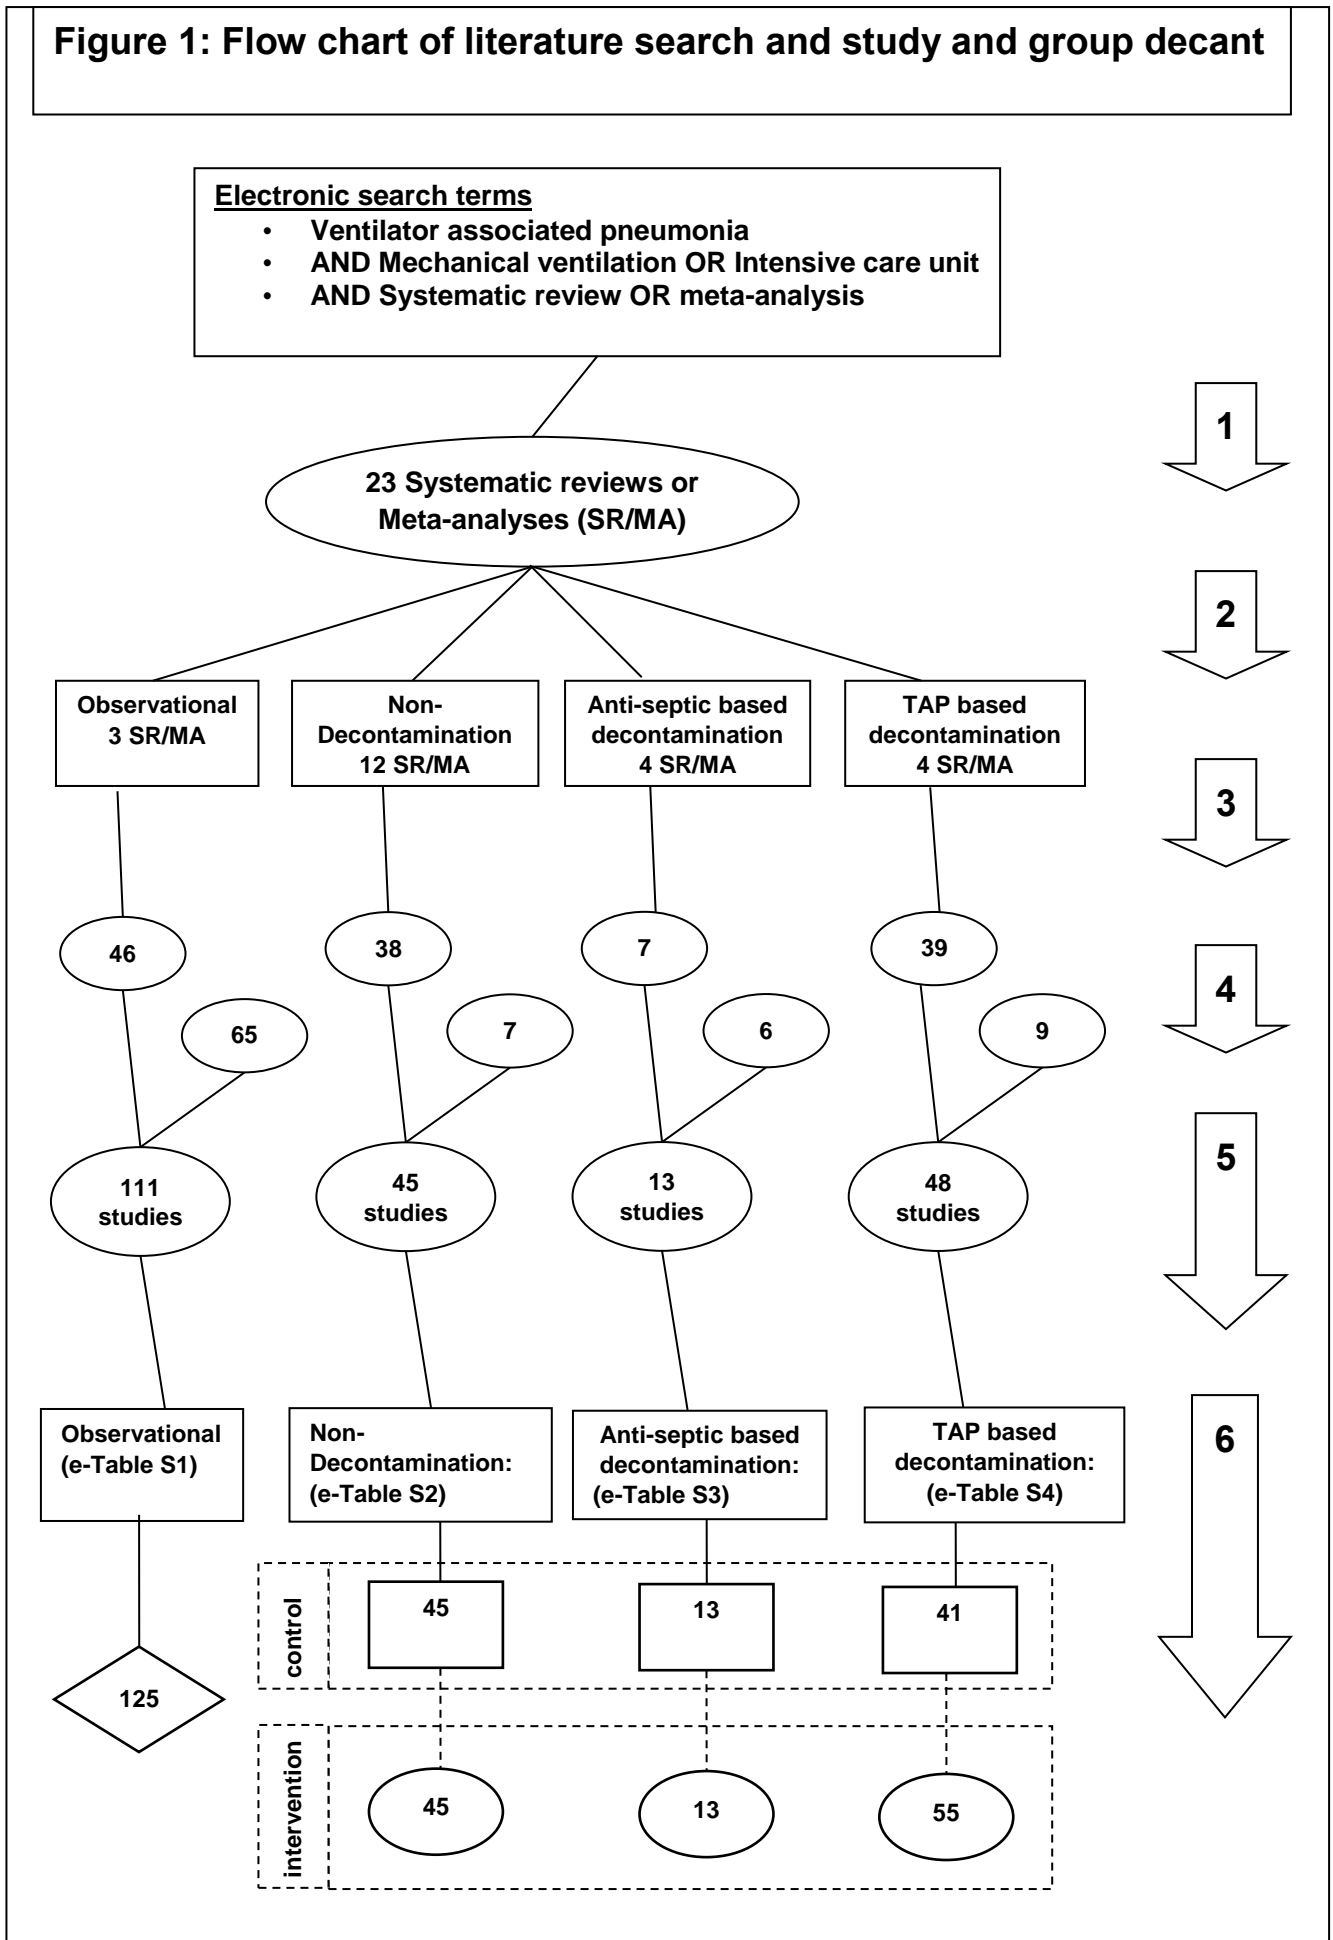

### Overall VAP effect size: non-decontamination methods

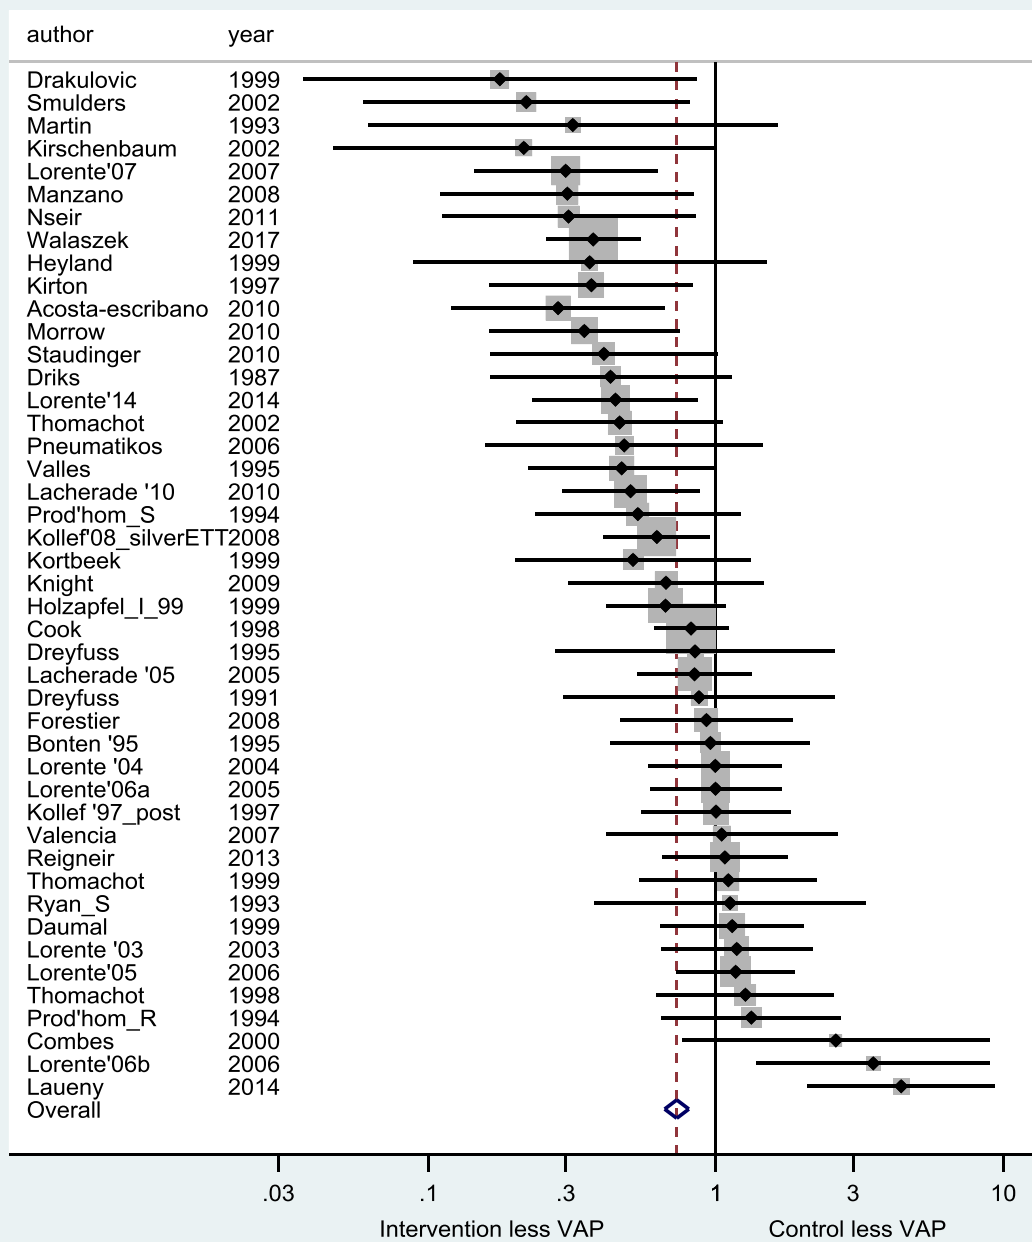

Fig S2

Caterpillar plots of the group specific (small squares) and summary (large open diamond, broken vertical line) effect size on the overall VAP incidence and 95 % CI among studies of non-decontamination methods of VAP prevention. Studies are listed in Table S2.

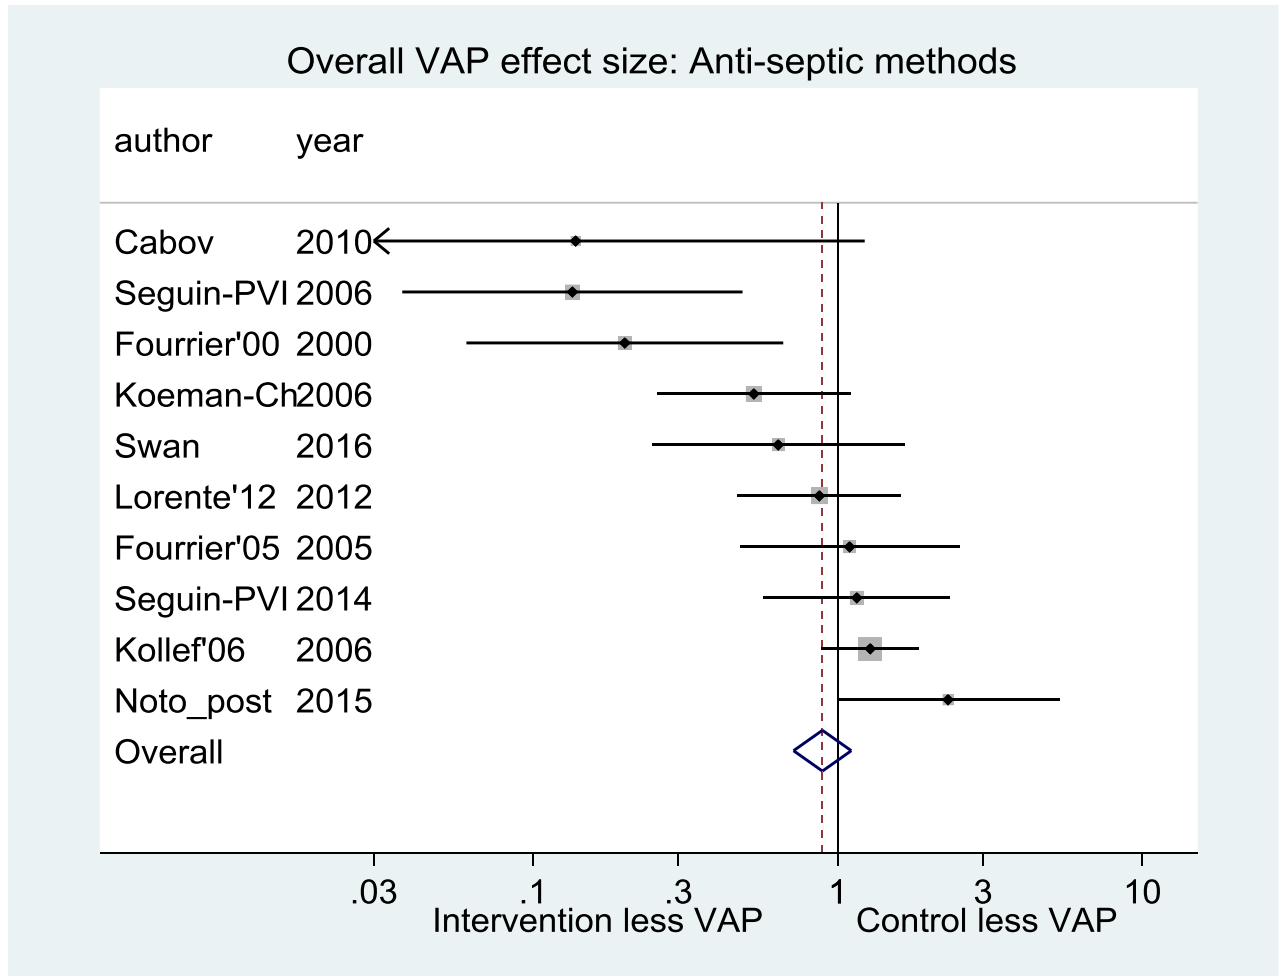

Fig S3

Caterpillar plots of the group specific (small squares) and summary (large open diamond, broken vertical line) effect size on the overall VAP incidence and 95 % CI among studies of anti-septic based methods of VAP prevention. Studies are listed in Table S3.

### Overall VAP effect size: TAP methods

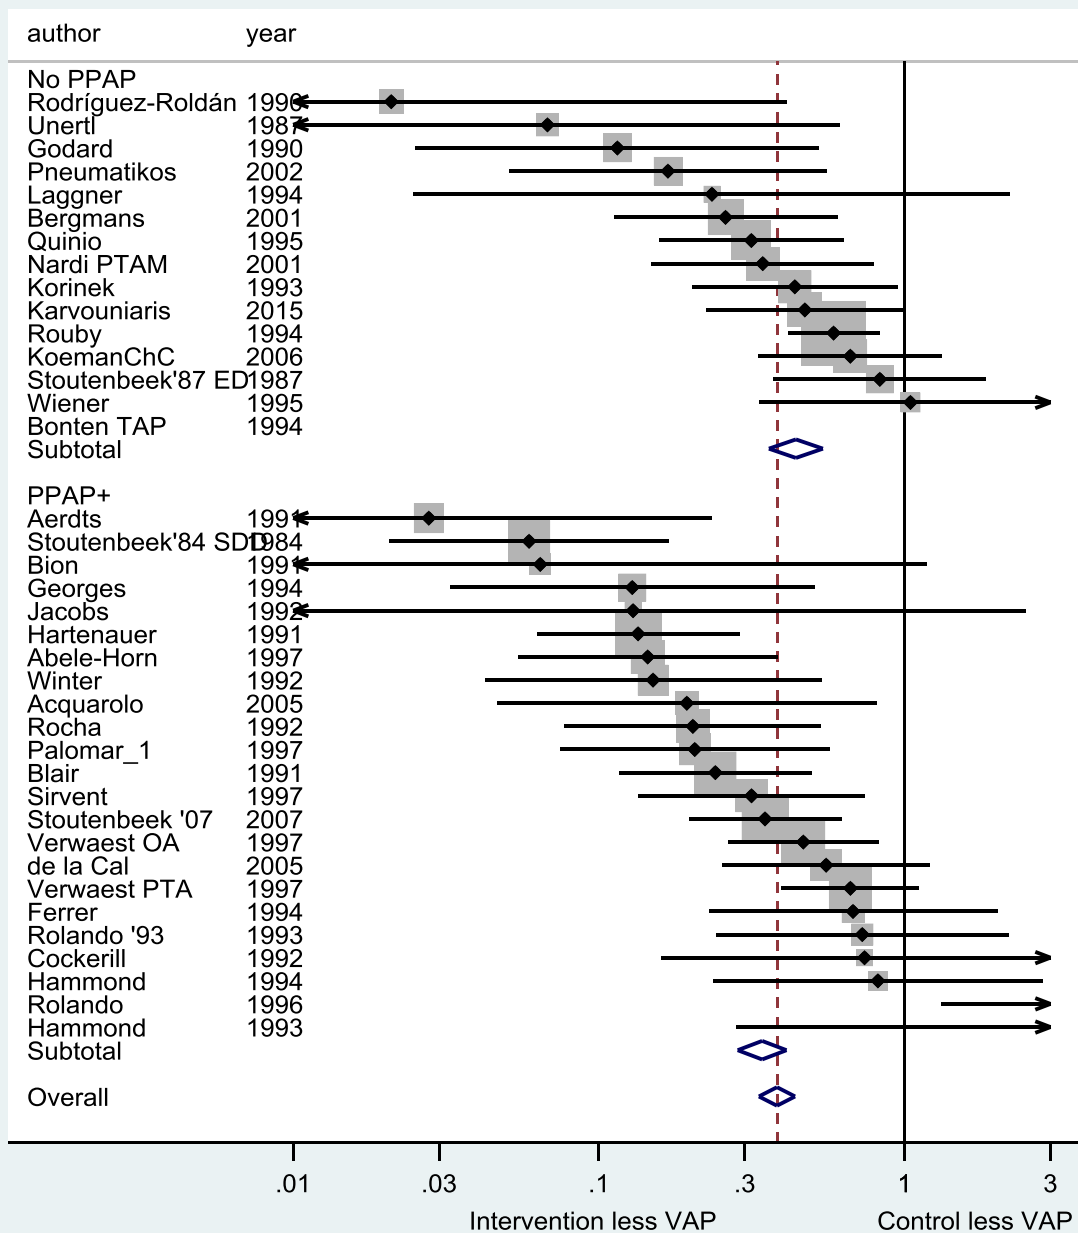

Fig S4

Caterpillar plots of the group specific (small squares) and summary (large open diamond, broken vertical line) effect size on the overall VAP incidence and 95 % CI among studies of TAP ±PPAP based methods of VAP prevention. TAP = Topical antibiotic prophylaxis. Studies are listed in Table S4.

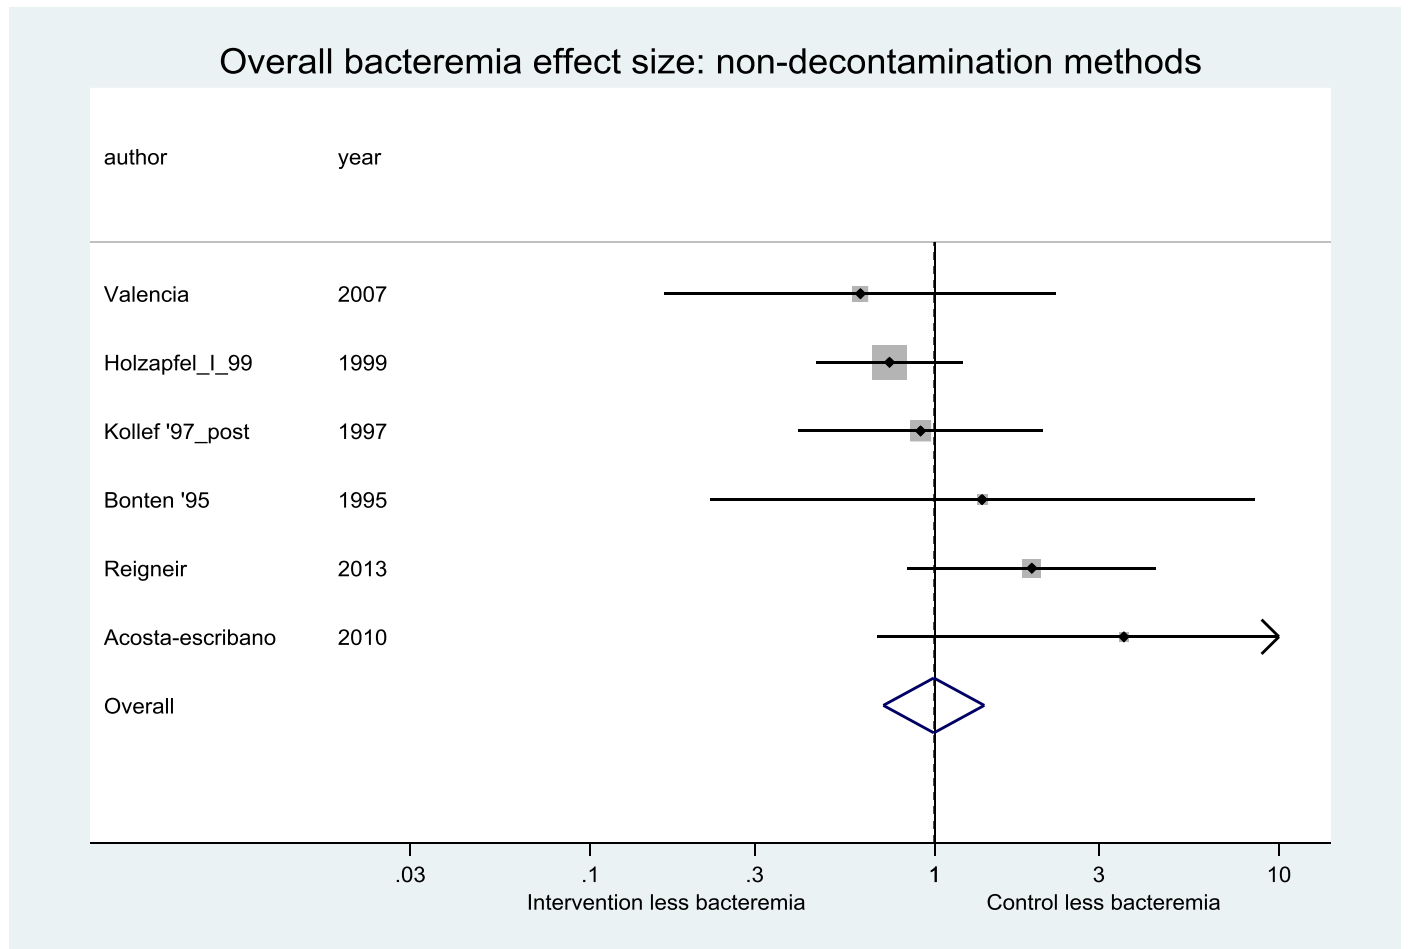

Fig S5

Caterpillar plots of the group specific (small squares) and summary (large open diamond, broken vertical line) effect size on the overall bacteremia incidence and 95 % CI among studies of non-decontamination methods of VAP prevention. Studies are listed in Table S2.



### Overall bacteremia effect size: Anti-septic methods

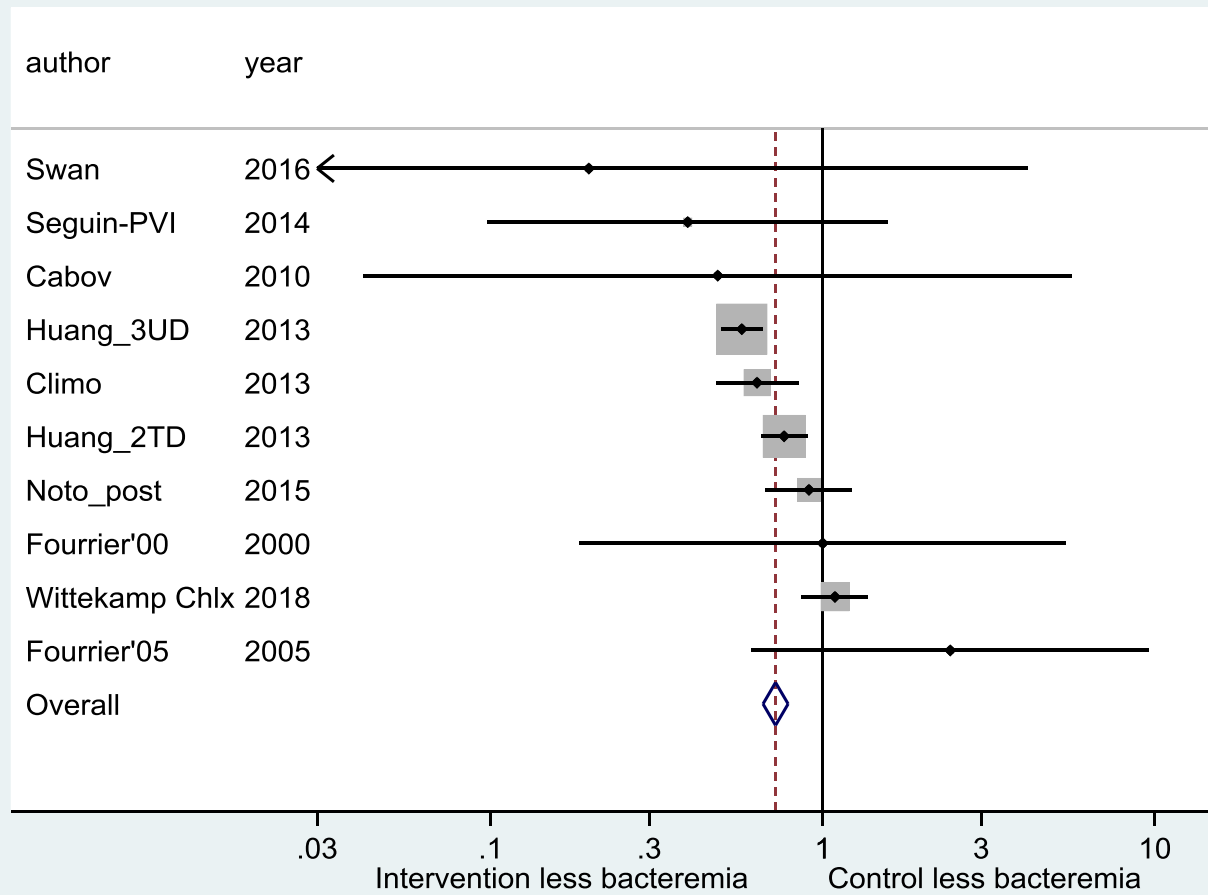

Fig S6

Caterpillar plots of the group specific (small squares) and summary (large open diamond, broken vertical line) effect size on the overall bacteremia incidence and 95 % CI among studies of anti-septic based methods of VAP prevention. Studies are listed in Table S3.

### Overall bacteremia effect size: TAP methods

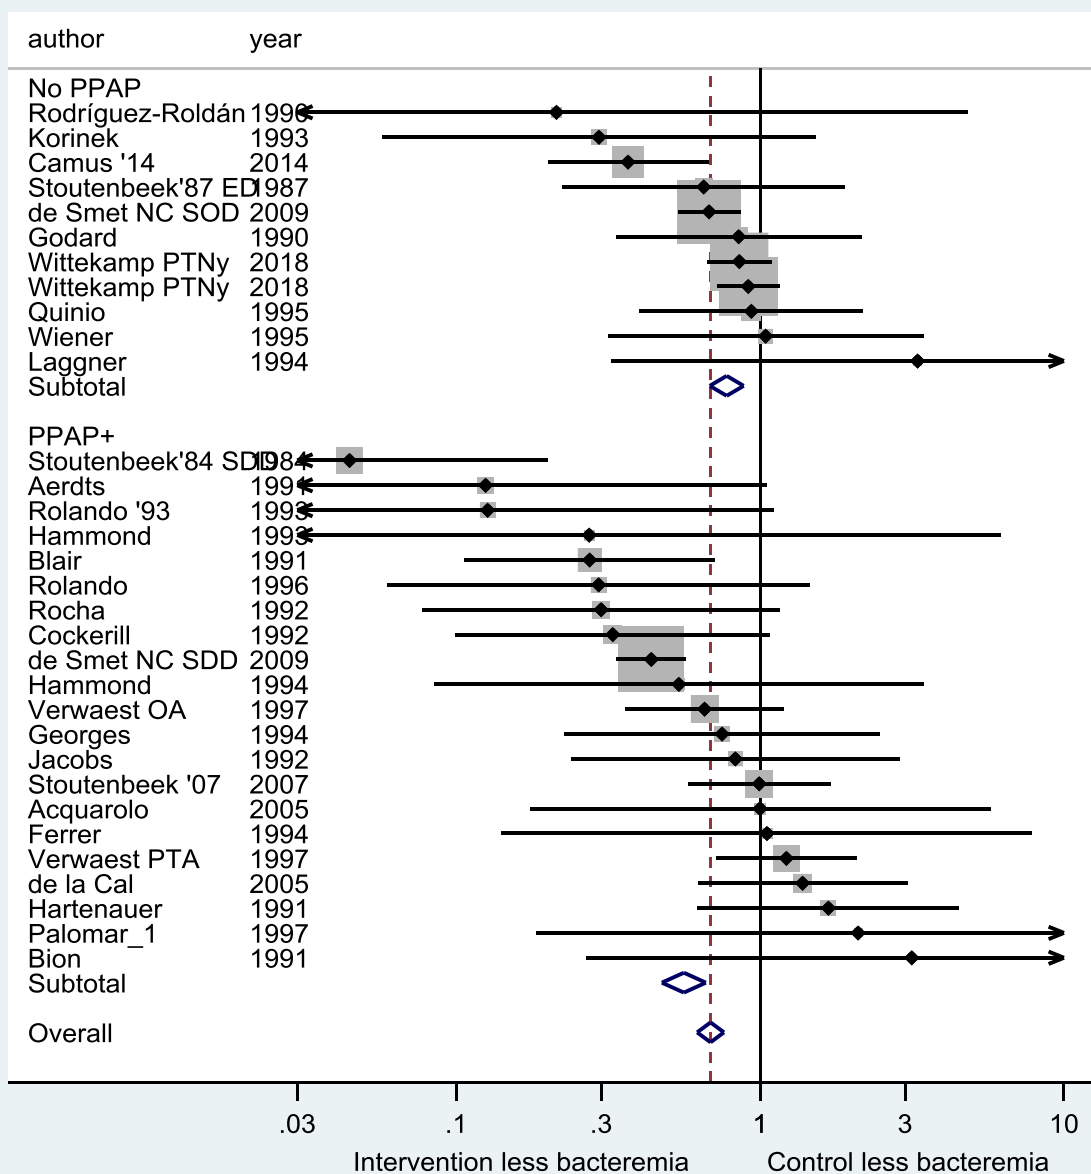

Fig S7

Caterpillar plots of the group specific (small squares) and summary (large open diamond, broken vertical line) effect size on the overall bacteremia incidence and 95 % CI among studies of TAP ±PPAP based methods of VAP prevention. TAP = Topical antibiotic prophylaxis. Studies are listed in Table S4.

Fig S8

GSEM model 1

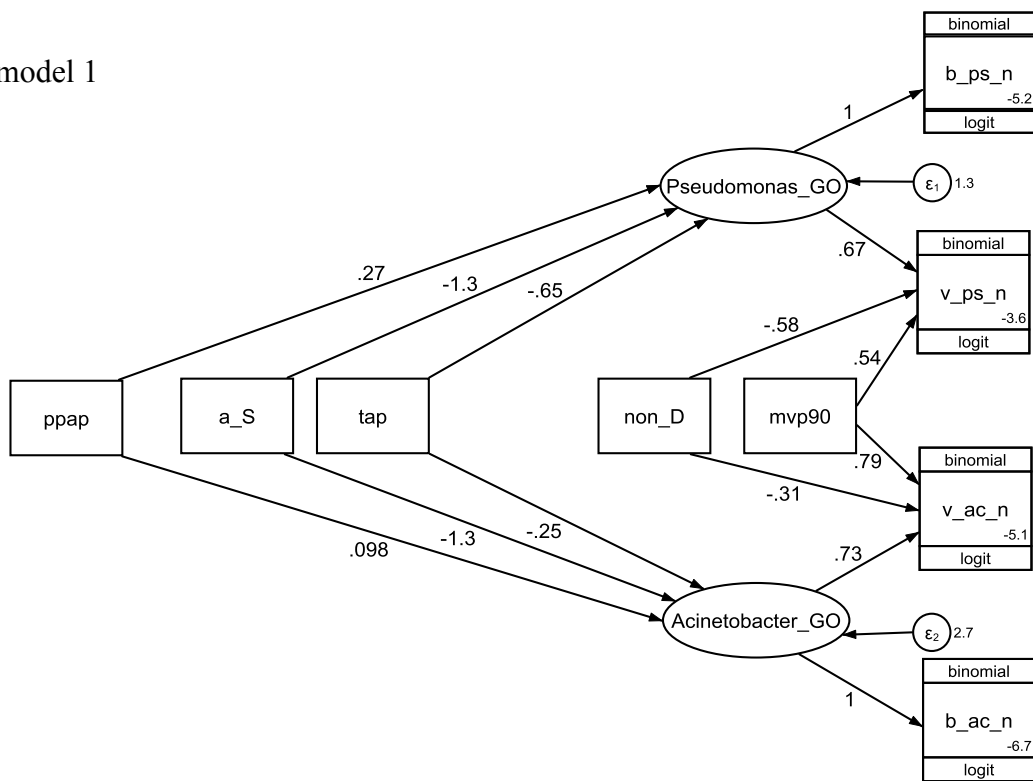

Fig S9  
GSEM model 2

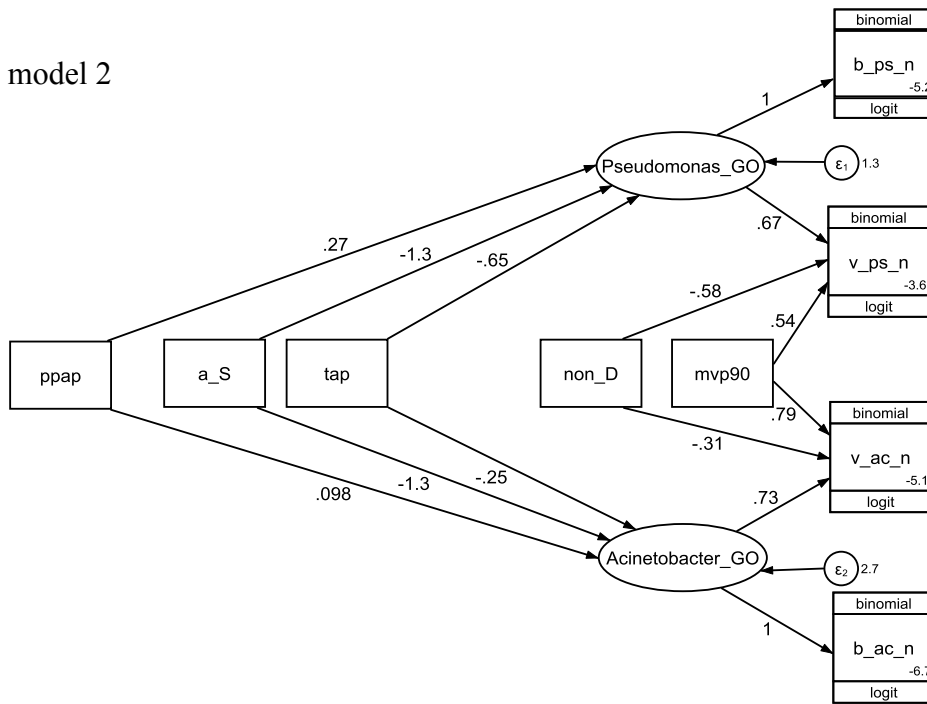

Fig S10  
GSEM model 3

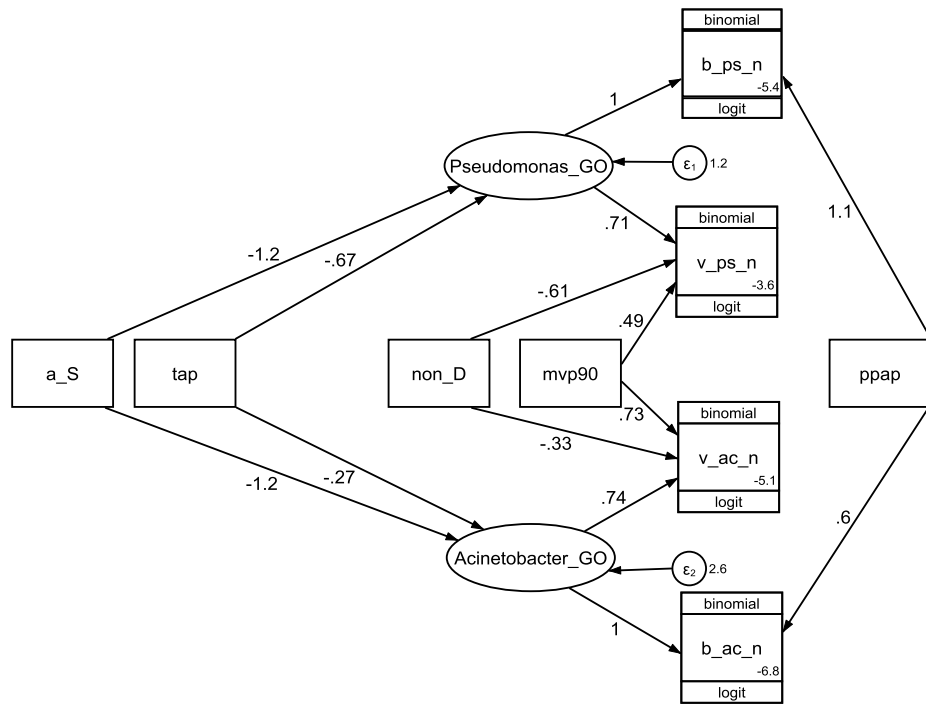

Fig S811

GSEM model 4

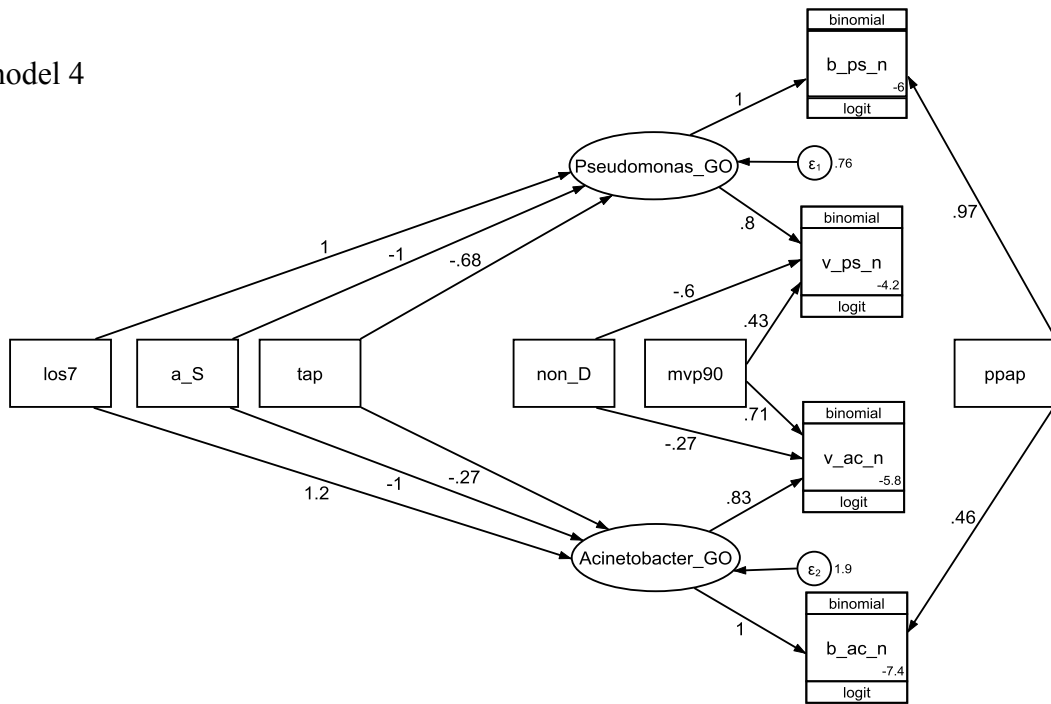

Fig S12

GSEM model 5

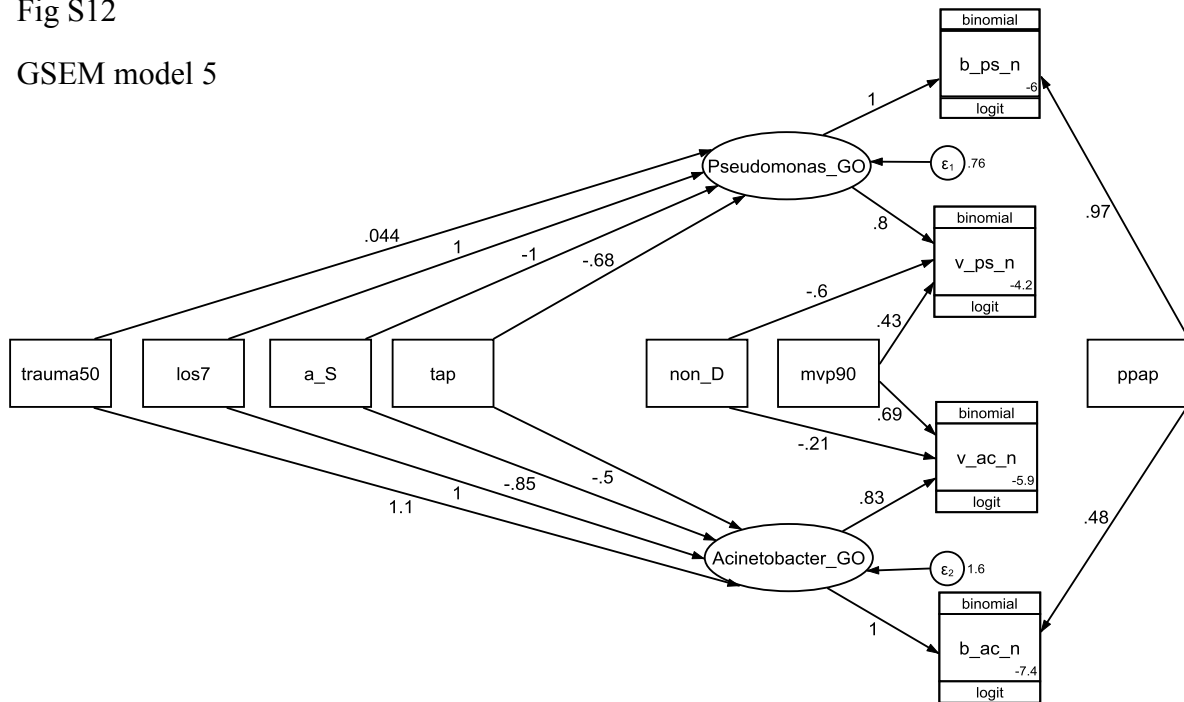

Fig S13  
GSEM model 6

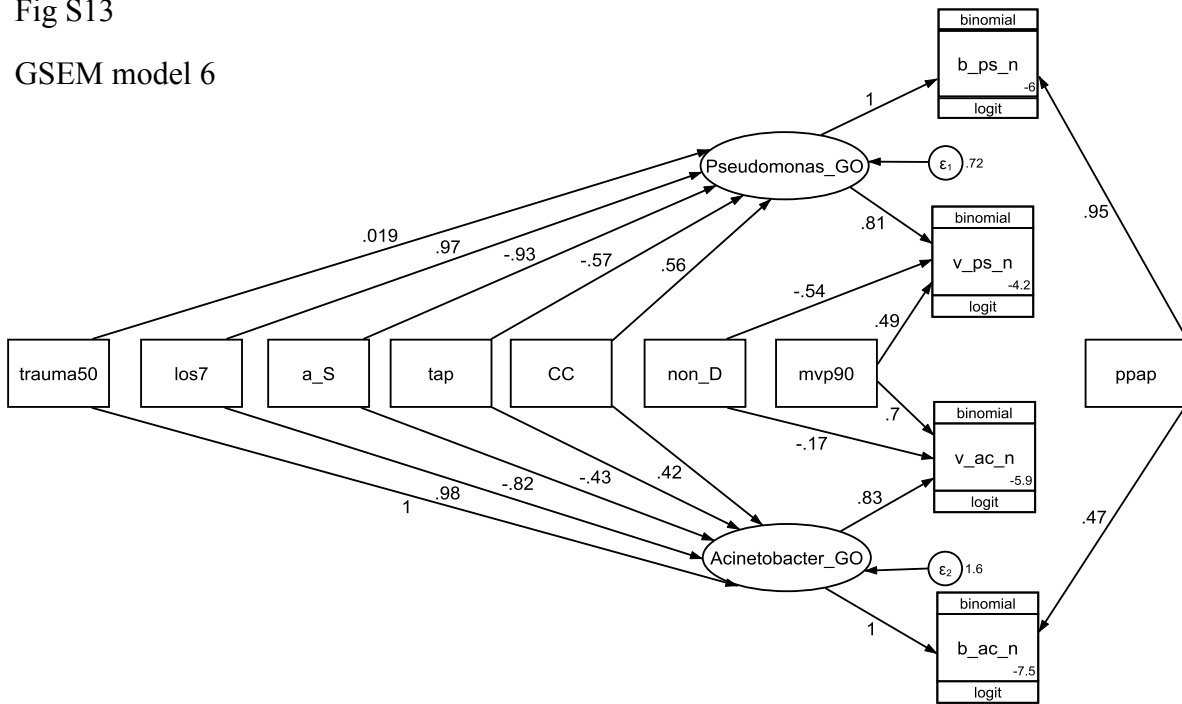



Fig S14

GSEM model 7

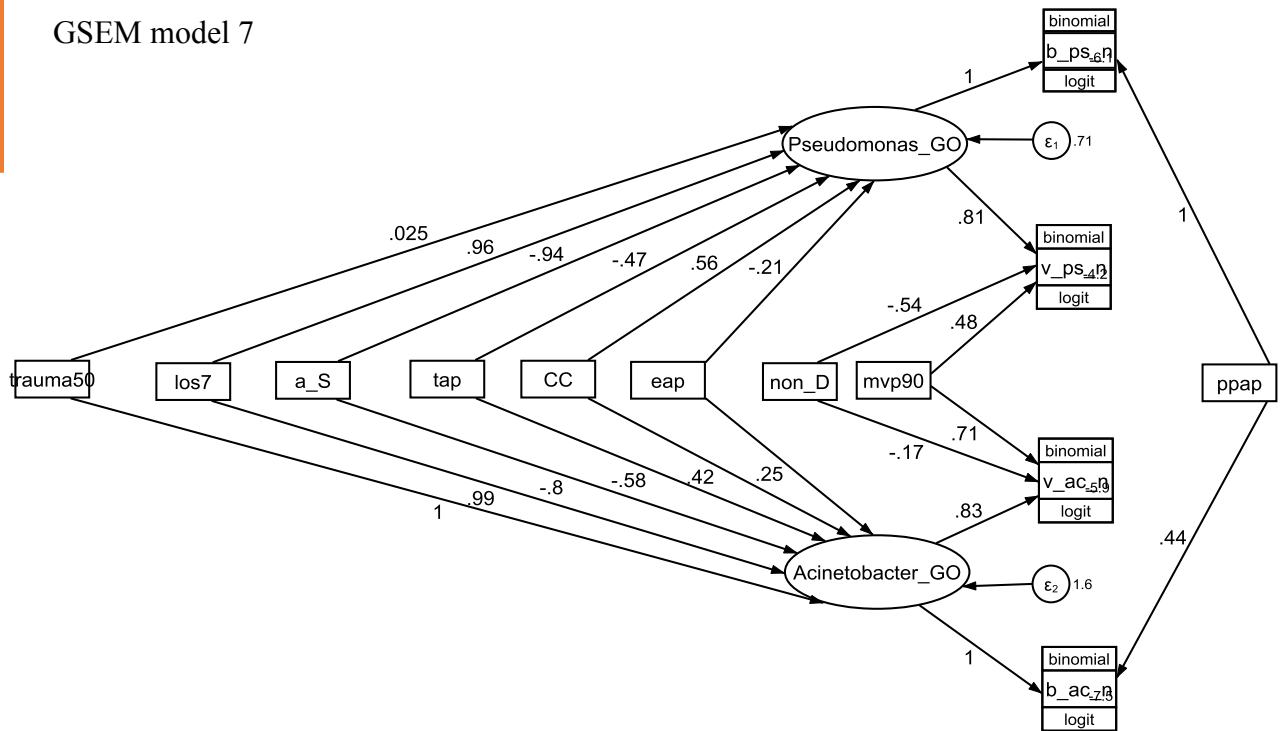

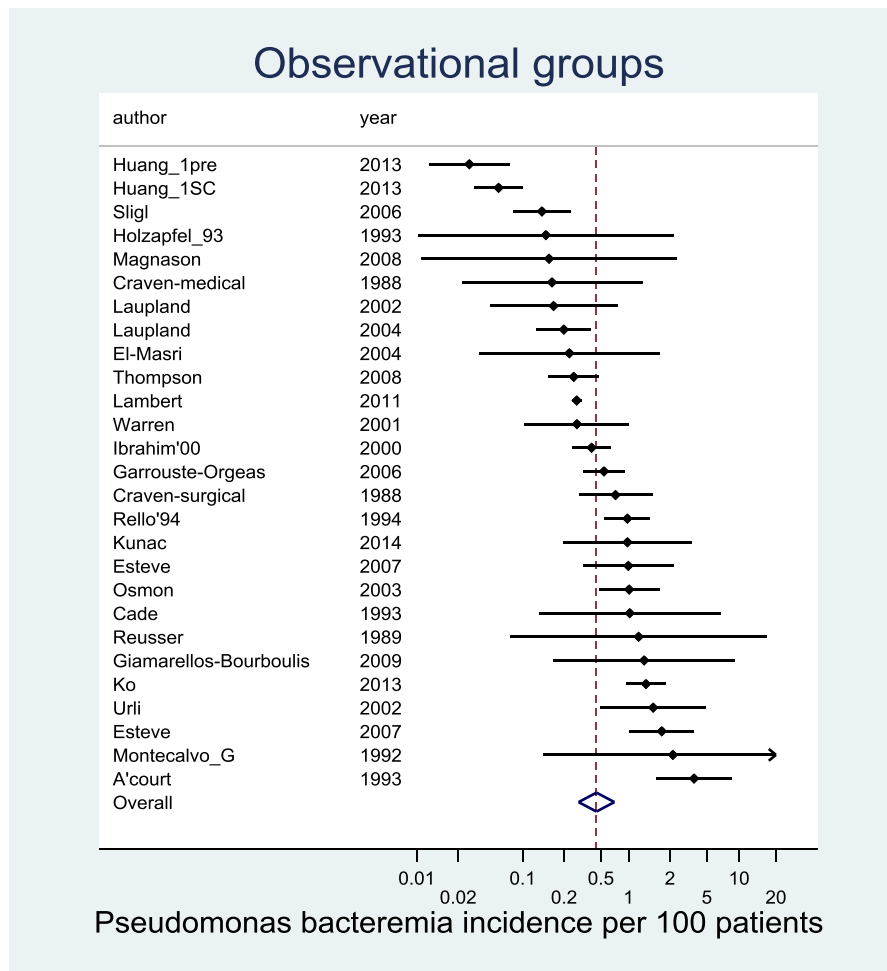

Fig S15

*Pseudomonas* bacteremia incidence among observational studies. Caterpillar plots of the group specific (small squares) and summary (large open diamonds) *Pseudomonas* bacteremia incidence proportion and 95 % CI. Groups are listed in Table S1. Note that the x axis is a logit scale and that groups with a zero event have a continuity correction (N+0.5) to enable them to appear in the plot. These zero count groups contribute < 1.5% in weight each towards the summary estimate. The central solid line is the *Pseudomonas* bacteremia benchmark.

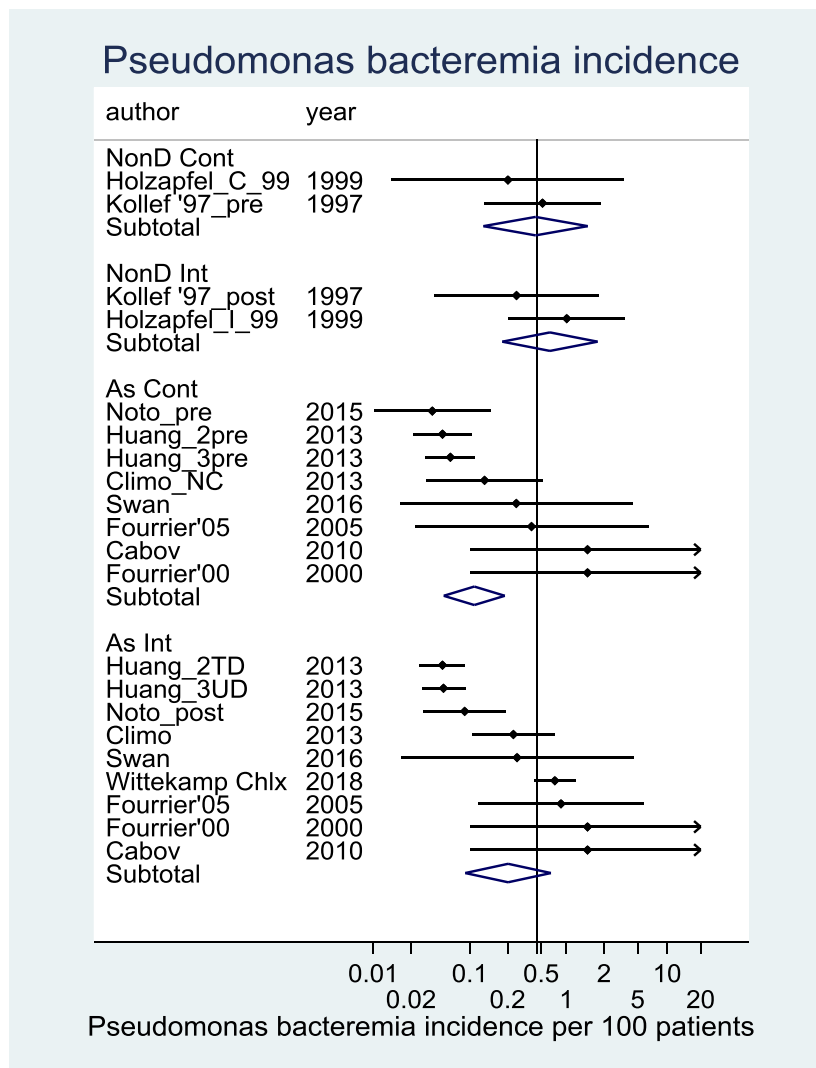

Fig S16

*Pseudomonas* bacteremia incidence among control and intervention groups of studies of non-decontamination methods & studies of anti-septic methods of infection prevention. Caterpillar plots of the group specific (small squares) and summary (large open diamonds) *Pseudomonas* bacteremia incidence proportion and 95 % CI. Groups are listed in Tables S2 & S3. Note that the x axis is a logit scale and that groups with a zero event have a continuity correction (N+0.5) to enable them to appear in the plot. These zero count groups contribute < 6% in weight each towards the summary estimate. The central solid line is the *Pseudomonas* bacteremia benchmark derived from Fig S15.

### Antibiotic control groups

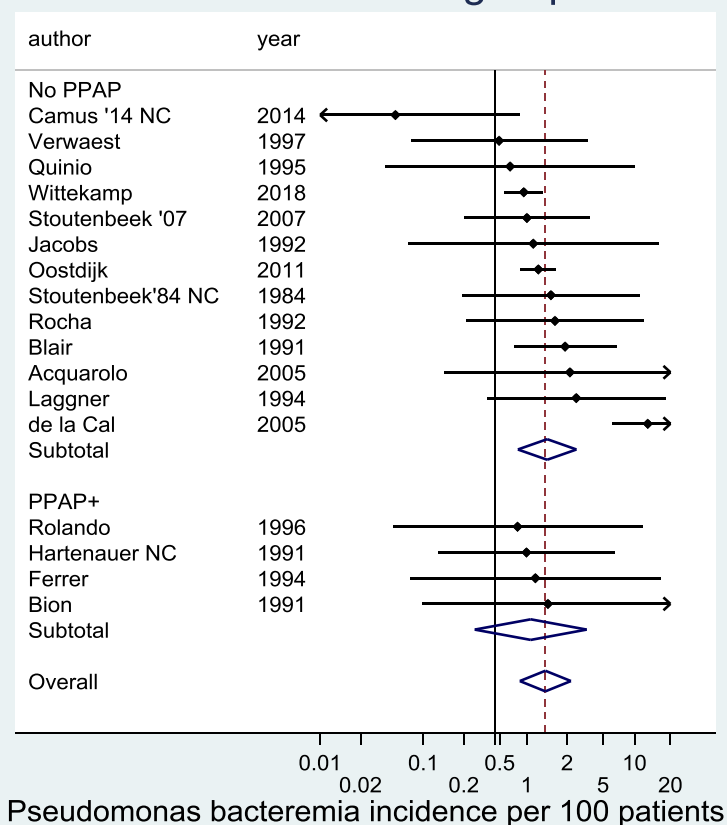

Fig S17

*Pseudomonas* bacteremia incidence among control groups of studies of TAP methods of infection prevention stratified by use of PPAP or not. Caterpillar plots of the group specific (small squares) and summary (large open diamonds) *Pseudomonas* bacteremia incidence proportion and 95 % CI. Groups are listed in Tables S4. Note that the x axis is a logit scale and that groups with a zero event have a continuity correction (N+0.5) to enable them to appear in the plot. These zero count groups contribute < 4% in weight each towards the summary estimate. The central solid line is the *Pseudomonas* bacteremia benchmark derived from Fig S15.

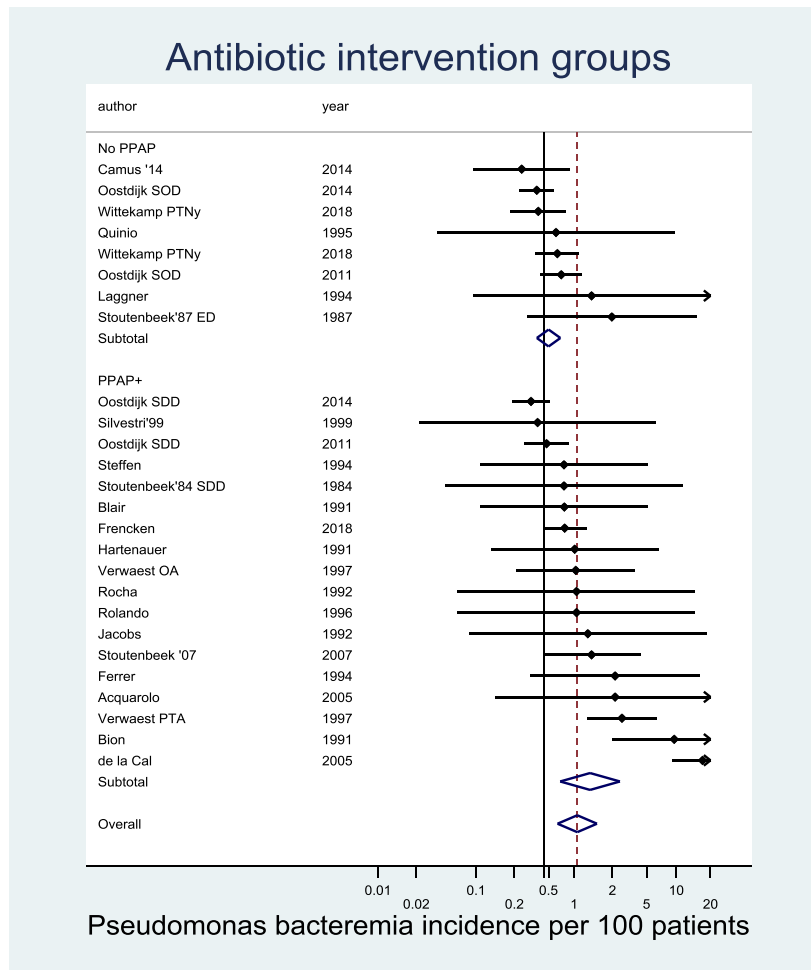

Fig S18

*Pseudomonas* bacteremia incidence among intervention groups of studies of topical antibiotic methods of infection prevention stratified by use of PPAP or not. Caterpillar plots of the group specific (small squares) and summary (large open diamonds) *Pseudomonas* bacteremia incidence proportion and 95 % CI. Groups are listed in Tables S4. Note that the x axis is a logit scale and that groups with a zero event have a continuity correction (N+0.5) to enable them to appear in the plot. These zero count groups contribute < 2% in weight each towards the summary estimate. The central solid line is the *Pseudomonas* bacteremia benchmark derived from Fig S15.

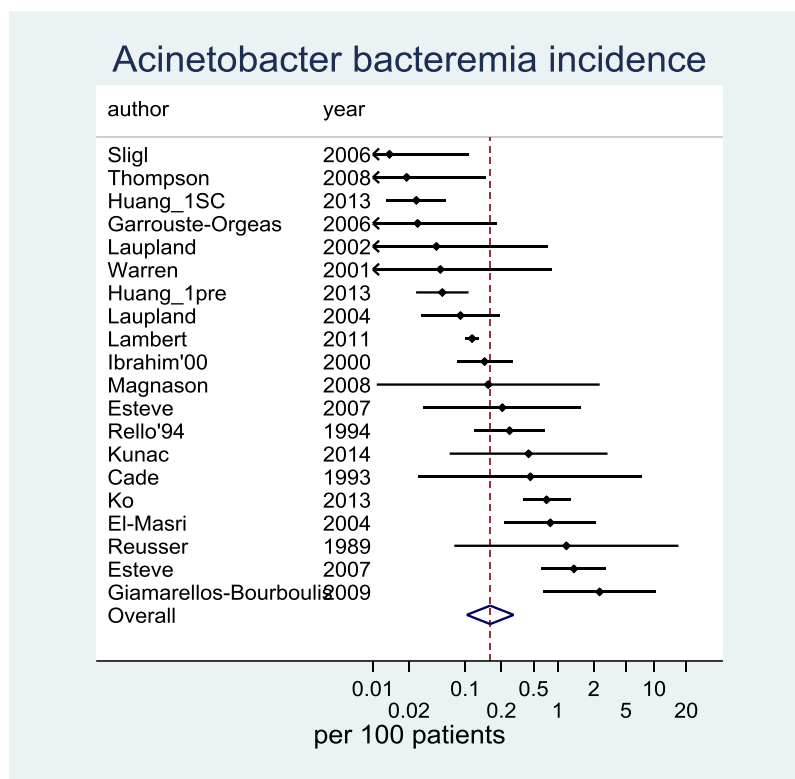

Fig S19

*Acinetobacter* bacteremia incidence among observational studies. Caterpillar plots of the group specific (small squares) and summary (large open diamonds)

*Acinetobacter* bacteremia incidence proportion and 95 % CI. Groups are listed in Table S1. Note that the x axis is a logit scale and that groups with a zero event have a continuity correction (N+0.5) to enable them to appear in the plot. These zero count groups contribute < 3% in weight each towards the summary estimate. The central solid line is the *Acinetobacter* bacteremia benchmark.

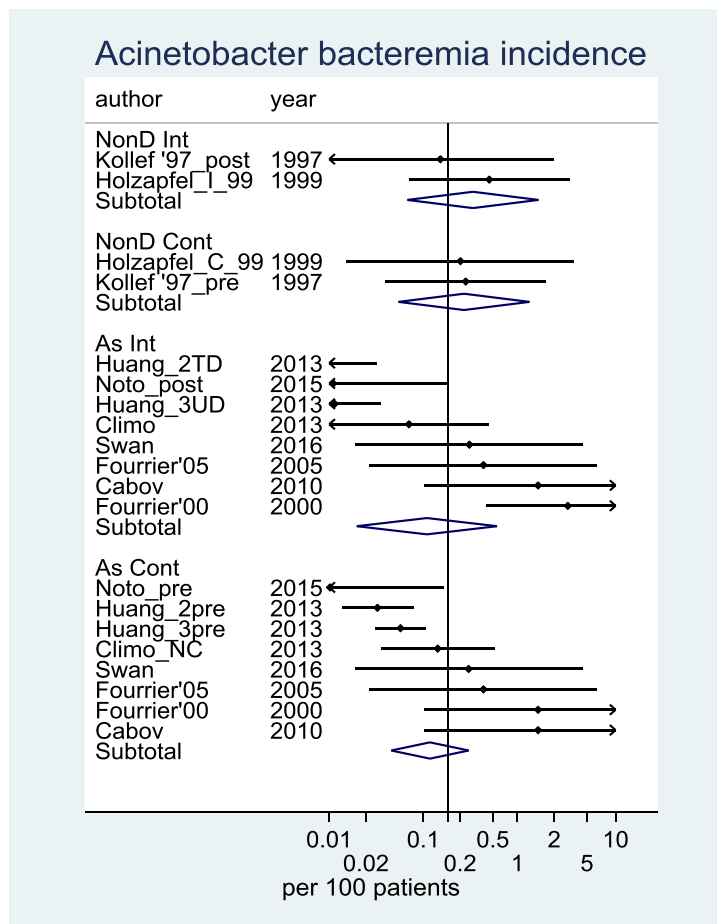

Fig S20

*Acinetobacter* bacteremia incidence among control and intervention groups of studies of non-decontamination methods & studies of anti-septic methods of infection prevention. Caterpillar plots of the group specific (small squares) and summary (large open diamonds) *Acinetobacter* bacteremia incidence proportion and 95 % CI. Groups are listed in Tables S2 & S3. Note that the x axis is a logit scale and that groups with a zero event have a continuity correction (N+0.5) to enable them to appear in the plot. These zero count groups contribute < 4% in weight each towards the summary estimate. The central solid line is the *Acinetobacter* bacteremia benchmark derived from Fig S19.

### Antibiotic control groups Acinetobacter bacteremia incidence

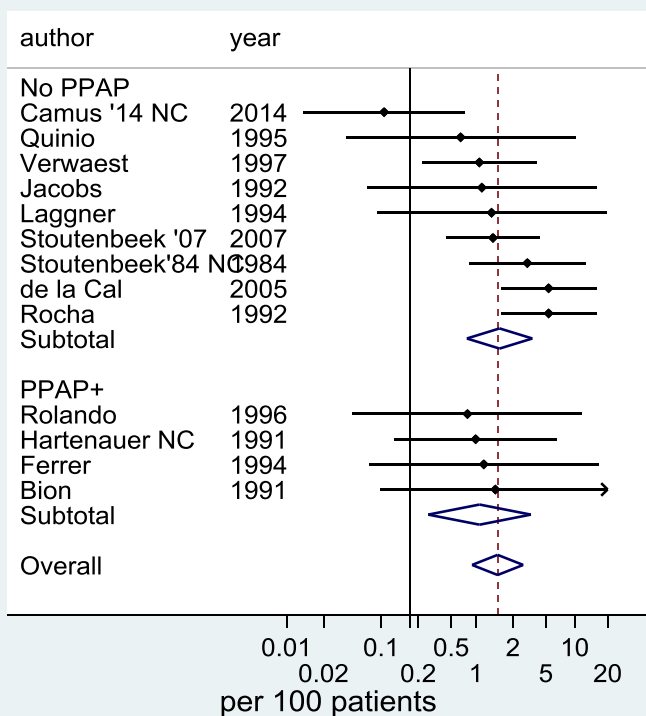

Fig S21

*Acinetobacter* bacteremia incidence among control groups of studies of topical antibiotic methods of infection prevention stratified by use of PPAP or not. Caterpillar plots of the group specific (small squares) and summary (large open diamonds) *Acinetobacter* bacteremia incidence proportion and 95 % CI. Groups are listed in Tables S4. Note that the x axis is a logit scale and that groups with a zero event have a continuity correction (N+0.5) to enable them to appear in the plot. These zero count groups contribute < 4.5% in weight each towards the summary estimate. The central solid line is the *Acinetobacter* bacteremia benchmark derived from Fig S19.



### Antibiotic intervention groups *Acinetobacter* bacteremia incidence

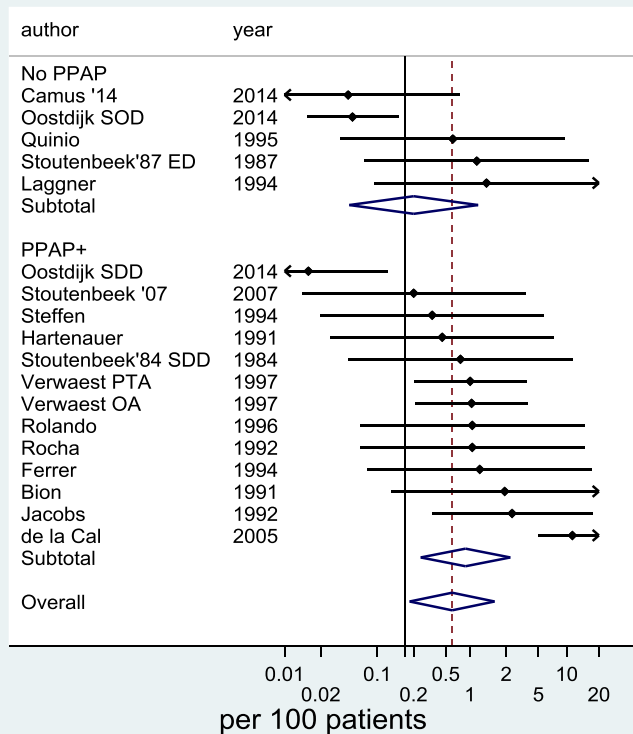

Fig S22

*Acinetobacter* bacteremia incidence among intervention groups of studies of topical antibiotic prevention stratified by use of PPAP or not. Caterpillar plots of the group specific (small squares) and summary (large open diamonds)

*Acinetobacter* bacteremia incidence proportion and 95 % CI. Groups are listed in Tables S4. Note that the x axis is a logit scale and that groups with a zero event have a continuity correction (N+0.5) to enable them to appear in the plot. These zero count groups contribute < 5% in weight each towards the summary estimate. The central solid line is the *Acinetobacter* bacteremia benchmark derived from Fig S18.
